# Supplementary material
Source: MDPI journal article supplement (https://www.mdpi.com/2673-8007/3/4/92)
Supplement: s1 [file s1]

## Supplementary sheet

**Table S1.** DOE: Full factorial screening with 24 independent runs

|    | 1      | 2        | 3         | 4         | 5             | 6         | 7         | 8                       |
|----|--------|----------|-----------|-----------|---------------|-----------|-----------|-------------------------|
|    | Exp No | Exp Name | Run Order | Incl/Excl | Lyoprotectant | Lyoprot   | Annealing | Bacterial concentration |
| 1  | 1      | N1       | 6         | Incl      | ✓             | Sucrose   | ✓         | 10 Yes                  |
| 2  | 2      | N2       | 15        | Incl      | ✓             | Trehalose | ✓         | 10 Yes                  |
| 3  | 3      | N3       | 4         | Incl      | ✓             | Sucrose   | ✓         | 20 Yes                  |
| 4  | 4      | N4       | 8         | Incl      | ✓             | Trehalose | ✓         | 20 Yes                  |
| 5  | 5      | N5       | 12        | Incl      | ✓             | Sucrose   | ✓         | 10 No                   |
| 6  | 6      | N6       | 3         | Incl      | ✓             | Trehalose | ✓         | 10 No                   |
| 7  | 7      | N7       | 19        | Incl      | ✓             | Sucrose   | ✓         | 20 No                   |
| 8  | 8      | N8       | 9         | Incl      | ✓             | Trehalose | ✓         | 20 No                   |
| 9  | 9      | N9       | 7         | Incl      | ✓             | Sucrose   | ✓         | 10 Yes                  |
| 10 | 10     | N10      | 18        | Incl      | ✓             | Trehalose | ✓         | 10 Yes                  |
| 11 | 11     | N11      | 2         | Incl      | ✓             | Sucrose   | ✓         | 20 Yes                  |
| 12 | 12     | N12      | 5         | Incl      | ✓             | Trehalose | ✓         | 20 Yes                  |
| 13 | 13     | N13      | 13        | Incl      | ✓             | Sucrose   | ✓         | 10 No                   |
| 14 | 14     | N14      | 16        | Incl      | ✓             | Trehalose | ✓         | 10 No                   |
| 15 | 15     | N15      | 1         | Incl      | ✓             | Sucrose   | ✓         | 20 No                   |
| 16 | 16     | N16      | 10        | Incl      | ✓             | Trehalose | ✓         | 20 No                   |
| 17 | 17     | N17      | 17        | Incl      | ✓             | Sucrose   | ✓         | 15 Yes                  |
| 18 | 18     | N18      | 11        | Incl      | ✓             | Trehalose | ✓         | 15 Yes                  |
| 19 | 19     | N19      | 14        | Incl      | ✓             | Sucrose   | ✓         | 15 No                   |
| 20 | 20     | N20      | 20        | Incl      | ✓             | Trehalose | ✓         | 15 No                   |
| 21 | 21     | N21      | 21        | Incl      | ✓             | Sucrose   | ✓         | 15 Yes                  |
| 22 | 22     | N22      | 22        | Incl      | ✓             | Trehalose | ✓         | 15 Yes                  |
| 23 | 23     | N23      | 23        | Incl      | ✓             | Sucrose   | ✓         | 15 No                   |
| 24 | 24     | N24      | 24        | Incl      | ✓             | Trehalose | ✓         | 15 No                   |

**Table S2.** Description of the cake appearance and their corresponding scoring numbers

| Score no. | Description                                                                                                                | Image                                                                               |
|-----------|----------------------------------------------------------------------------------------------------------------------------|-------------------------------------------------------------------------------------|
| 1         | Intact and homogenous cake                                                                                                 |  |
| 2         | Intact, heterogenous cake structure and color change of the cake (yellow to dark yellow or orange)                         |  |
| 3         | Shrinkage of the cake around the edges and crust appearance of bottom part of the cake but no change in height of the cake |  |
| 4         | Partial collapse, decrease in height of the cake < 60%                                                                     |  |
| 5         | Collapsed cake (decrease in height of >60%)                                                                                |  |

**Table S3.** Tukey post-hoc tests: effects and interactions of the factors on water content of freeze-dried R2LC

**Post Hoc Tests- Water content**

**Post Hoc Comparisons - Lyoprotectant**

|         |           | Mean Difference | SE    | t     | p <sub>tukey</sub> |
|---------|-----------|-----------------|-------|-------|--------------------|
| Sucrose | Trehalose | 0.597           | 0.157 | 3.807 | 0.004 **           |

\*\* p < .01

*Note.* Results are averaged over the levels of: Annealing, Lyoprotectant concentration, Bacterial concentration

**Post Hoc Comparisons - Annealing**

|    |     | Mean Difference | SE    | t      | p <sub>tukey</sub> |
|----|-----|-----------------|-------|--------|--------------------|
| No | Yes | -0.385          | 0.157 | -2.457 | 0.036 *            |

\* p < .05

*Note.* Results are averaged over the levels of: Lyoprotectant, Lyoprotectant concentration, Bacterial concentration

**Post Hoc Comparisons - Lyoprotectant concentration**

|    |    | Mean Difference | SE    | t      | p <sub>tukey</sub> |
|----|----|-----------------|-------|--------|--------------------|
| 10 | 15 | -0.220          | 0.192 | -1.146 | 0.512              |
|    | 20 | -1.464          | 0.192 | -7.626 | < .001 ***         |
| 15 | 20 | -1.244          | 0.192 | -6.480 | < .001 ***         |

\*\*\* p < .001

*Note.* P-value adjusted for comparing a family of 3

*Note.* Results are averaged over the levels of: Lyoprotectant, Annealing, Bacterial concentration

**Post Hoc Comparisons - Bacterial concentration**

|     |    | Mean Difference | SE    | t      | p <sub>tukey</sub> |
|-----|----|-----------------|-------|--------|--------------------|
| E10 | E9 | -0.825          | 0.157 | -5.264 | < .001 ***         |

\*\*\* p < .001

*Note.* Results are averaged over the levels of: Lyoprotectant, Annealing, Lyoprotectant concentration

**Post Hoc Comparisons - Lyoprotectant \* Annealing**

|              |               | Mean Difference | SE    | t      | p <sub>tukey</sub> |
|--------------|---------------|-----------------|-------|--------|--------------------|
| Sucrose No   | Trehalose No  | 0.235           | 0.222 | 1.060  | 0.720              |
|              | Sucrose Yes   | -0.747          | 0.222 | -3.369 | 0.034 *            |
|              | Trehalose Yes | 0.212           | 0.222 | 0.955  | 0.777              |
| Trehalose No | Sucrose Yes   | -0.982          | 0.222 | -4.429 | 0.007 **           |
|              | Trehalose Yes | -0.023          | 0.222 | -0.105 | 1.000              |

### Post Hoc Comparisons - Lyoprotectant \* Annealing

|             |               | Mean Difference | SE    | t     | p <sub>tukey</sub> |
|-------------|---------------|-----------------|-------|-------|--------------------|
| Sucrose Yes | Trehalose Yes | 0.958           | 0.222 | 4.324 | 0.009 **           |

\* p < .05, \*\* p < .01

*Note.* P-value adjusted for comparing a family of 4

*Note.* Results are averaged over the levels of: Lyoprotectant concentration, Bacterial concentration

### Post Hoc Comparisons - Lyoprotectant \* Lyoprotectant concentration

|              |              | Mean Difference | SE    | t      | p <sub>tukey</sub> |
|--------------|--------------|-----------------|-------|--------|--------------------|
| Sucrose 10   | Trehalose 10 | -0.218          | 0.271 | -0.801 | 0.960              |
|              | Sucrose 15   | -0.605          | 0.271 | -2.229 | 0.311              |
|              | Trehalose 15 | -0.053          | 0.271 | -0.193 | 1.000              |
|              | Sucrose 20   | -2.300          | 0.271 | -8.473 | < .001 ***         |
|              | Trehalose 20 | -0.845          | 0.271 | -3.113 | 0.094              |
| Trehalose 10 | Sucrose 15   | -0.387          | 0.271 | -1.428 | 0.712              |
|              | Trehalose 15 | 0.165           | 0.271 | 0.608  | 0.988              |
|              | Sucrose 20   | -2.082          | 0.271 | -7.672 | < .001 ***         |
|              | Trehalose 20 | -0.627          | 0.271 | -2.312 | 0.280              |
| Sucrose 15   | Trehalose 15 | 0.552           | 0.271 | 2.035  | 0.393              |
|              | Sucrose 20   | -1.695          | 0.271 | -6.244 | 0.001 **           |
|              | Trehalose 20 | -0.240          | 0.271 | -0.884 | 0.941              |
| Trehalose 15 | Sucrose 20   | -2.248          | 0.271 | -8.280 | < .001 ***         |
|              | Trehalose 20 | -0.792          | 0.271 | -2.920 | 0.123              |
| Sucrose 20   | Trehalose 20 | 1.455           | 0.271 | 5.360  | 0.004 **           |

\* p < .05, \*\* p < .01, \*\*\* p < .001

*Note.* P-value adjusted for comparing a family of 6

*Note.* Results are averaged over the levels of: Annealing, Bacterial concentration

### Post Hoc Comparisons - Lyoprotectant \* Bacterial concentration

|               |               | Mean Difference | SE    | t      | p <sub>tukey</sub> |
|---------------|---------------|-----------------|-------|--------|--------------------|
| Sucrose E10   | Trehalose E10 | 0.328           | 0.222 | 1.481  | 0.486              |
|               | Sucrose E9    | -1.093          | 0.222 | -4.933 | 0.004 **           |
|               | Trehalose E9  | -0.228          | 0.222 | -1.030 | 0.737              |
| Trehalose E10 | Sucrose E9    | -1.422          | 0.222 | -6.414 | < .001 ***         |
|               | Trehalose E9  | -0.557          | 0.222 | -2.512 | 0.124              |
| Sucrose E9    | Trehalose E9  | 0.865           | 0.222 | 3.903  | 0.016 *            |

*Note.* Results are averaged over the levels of: Annealing, Lyoprotectant concentration

*Note.* P-value adjusted for comparing a family of 4

\* p < .05, \*\* p < .01, \*\*\* p < .001

# Post Hoc Comparisons - Lyoprotectant \* Annealing \* Lyoprotectant concentration

|                  |                  | Mean Difference | SE    | t       | p <sub>Tukey</sub> |
|------------------|------------------|-----------------|-------|---------|--------------------|
| Sucrose No 10    | Trehalose No 10  | -0.215          | 0.163 | -1.323  | 0.912              |
|                  | Sucrose Yes 10   | -0.210          | 0.163 | -1.292  | 0.920              |
|                  | Trehalose Yes 10 | -0.430          | 0.163 | -2.646  | 0.521              |
|                  | Sucrose No 15    | -0.575          | 0.163 | -3.538  | 0.347              |
|                  | Trehalose No 15  | -0.185          | 0.163 | -1.138  | 0.953              |
|                  | Sucrose Yes 15   | -0.845          | 0.163 | -5.199  | 0.184              |
|                  | Trehalose Yes 15 | -0.130          | 0.163 | -0.800  | 0.993              |
|                  | Sucrose No 20    | -1.525          | 0.163 | -9.384  | 0.061              |
|                  | Trehalose No 20  | -0.995          | 0.163 | -6.122  | 0.137              |
|                  | Sucrose Yes 20   | -3.285          | 0.163 | -20.213 | 0.014 *            |
|                  | Trehalose Yes 20 | -0.905          | 0.163 | -5.569  | 0.162              |
| Trehalose No 10  | Sucrose Yes 10   | 0.005           | 0.163 | 0.031   | 1.000              |
|                  | Trehalose Yes 10 | -0.215          | 0.163 | -1.323  | 0.912              |
|                  | Sucrose No 15    | -0.360          | 0.163 | -2.215  | 0.639              |
|                  | Trehalose No 15  | 0.030           | 0.163 | 0.185   | 1.000              |
|                  | Sucrose Yes 15   | -0.630          | 0.163 | -3.876  | 0.301              |
|                  | Trehalose Yes 15 | 0.085           | 0.163 | 0.523   | 1.000              |
|                  | Sucrose No 20    | -1.310          | 0.163 | -8.061  | 0.082              |
|                  | Trehalose No 20  | -0.780          | 0.163 | -4.799  | 0.211              |
|                  | Sucrose Yes 20   | -3.070          | 0.163 | -18.890 | 0.015 *            |
|                  | Trehalose Yes 20 | -0.690          | 0.163 | -4.246  | 0.260              |
| Sucrose Yes 10   | Trehalose Yes 10 | -0.220          | 0.163 | -1.354  | 0.904              |
|                  | Sucrose No 15    | -0.365          | 0.163 | -2.246  | 0.630              |
|                  | Trehalose No 15  | 0.025           | 0.163 | 0.154   | 1.000              |
|                  | Sucrose Yes 15   | -0.635          | 0.163 | -3.907  | 0.297              |
|                  | Trehalose Yes 15 | 0.080           | 0.163 | 0.492   | 1.000              |
|                  | Sucrose No 20    | -1.315          | 0.163 | -8.091  | 0.081              |
|                  | Trehalose No 20  | -0.785          | 0.163 | -4.830  | 0.209              |
|                  | Sucrose Yes 20   | -3.075          | 0.163 | -18.921 | 0.015 *            |
|                  | Trehalose Yes 20 | -0.695          | 0.163 | -4.276  | 0.257              |
| Trehalose Yes 10 | Sucrose No 15    | -0.145          | 0.163 | -0.892  | 0.987              |
|                  | Trehalose No 15  | 0.245           | 0.163 | 1.508   | 0.861              |
|                  | Sucrose Yes 15   | -0.415          | 0.163 | -2.554  | 0.545              |
|                  | Trehalose Yes 15 | 0.300           | 0.163 | 1.846   | 0.754              |
|                  | Sucrose No 20    | -1.095          | 0.163 | -6.738  | 0.115              |
|                  | Trehalose No 20  | -0.565          | 0.163 | -3.477  | 0.357              |
|                  | Sucrose Yes 20   | -2.855          | 0.163 | -17.567 | 0.017 *            |
|                  | Trehalose Yes 20 | -0.475          | 0.163 | -2.923  | 0.458              |
| Sucrose No 15    | Trehalose No 15  | 0.390           | 0.163 | 2.400   | 0.586              |
|                  | Sucrose Yes 15   | -0.270          | 0.163 | -1.661  | 0.813              |
|                  | Trehalose Yes 15 | 0.445           | 0.163 | 2.738   | 0.499              |
|                  | Sucrose No 20    | -0.950          | 0.163 | -5.845  | 0.149              |
|                  | Trehalose No 20  | -0.420          | 0.163 | -2.584  | 0.537              |

**Post Hoc Comparisons - Lyoprotectant \* Annealing \* Lyoprotectant concentration**

|                  |                  | <b>Mean Difference</b> | <b>SE</b> | <b>t</b> | <b>p<sub>Tukey</sub></b> |
|------------------|------------------|------------------------|-----------|----------|--------------------------|
| Trehalose No 15  | Sucrose Yes 20   | -2.710                 | 0.163     | -16.675  | 0.019 *                  |
|                  | Trehalose Yes 20 | -0.330                 | 0.163     | -2.031   | 0.695                    |
|                  | Sucrose Yes 15   | -0.660                 | 0.163     | -4.061   | 0.279                    |
|                  | Trehalose Yes 15 | 0.055                  | 0.163     | 0.338    | 1.000                    |
|                  | Sucrose No 20    | -1.340                 | 0.163     | -8.245   | 0.079                    |
|                  | Trehalose No 20  | -0.810                 | 0.163     | -4.984   | 0.198                    |
| Sucrose Yes 15   | Sucrose Yes 20   | -3.100                 | 0.163     | -19.075  | 0.015 *                  |
|                  | Trehalose Yes 20 | -0.720                 | 0.163     | -4.430   | 0.242                    |
|                  | Trehalose Yes 15 | 0.715                  | 0.163     | 4.399    | 0.245                    |
|                  | Sucrose No 20    | -0.680                 | 0.163     | -4.184   | 0.266                    |
|                  | Trehalose No 20  | -0.150                 | 0.163     | -0.923   | 0.984                    |
| Trehalose Yes 15 | Sucrose Yes 20   | -2.440                 | 0.163     | -15.014  | 0.024 *                  |
|                  | Trehalose Yes 20 | -0.060                 | 0.163     | -0.369   | 1.000                    |
|                  | Sucrose No 20    | -1.395                 | 0.163     | -8.584   | 0.073                    |
|                  | Trehalose No 20  | -0.865                 | 0.163     | -5.322   | 0.176                    |
| Sucrose No 20    | Sucrose Yes 20   | -3.155                 | 0.163     | -19.413  | 0.015 *                  |
|                  | Trehalose Yes 20 | -0.775                 | 0.163     | -4.769   | 0.213                    |
|                  | Trehalose No 20  | 0.530                  | 0.163     | 3.261    | 0.392                    |
|                  | Sucrose Yes 20   | -1.760                 | 0.163     | -10.829  | 0.047 *                  |
| Trehalose No 20  | Trehalose Yes 20 | 0.620                  | 0.163     | 3.815    | 0.309                    |
|                  | Sucrose Yes 20   | -2.290                 | 0.163     | -14.091  | 0.028 *                  |
|                  | Trehalose Yes 20 | 0.090                  | 0.163     | 0.554    | 1.000                    |
| Sucrose Yes 20   | Trehalose Yes 20 | 2.380                  | 0.163     | 14.644   | 0.025 *                  |

\* p < .05

*Note.* P-value adjusted for comparing a family of 12

*Note.* Results are averaged over the levels of: Bacterial concentration

**Table S4.** Tukey post-hoc tests: effects and interactions of the factors on Tg of freeze-dried R2LC

## Post Hoc Tests- Glass transition temperature

### Standard

#### Post Hoc Comparisons - Lyoprotectant

|         |           | Mean Difference | SE    | t       | p <sub>tukey</sub> |
|---------|-----------|-----------------|-------|---------|--------------------|
| Sucrose | Trehalose | -33.803         | 2.122 | -15.930 | < .001 ***         |

\*\*\* p < .001

*Note.* Results are averaged over the levels of: Annealing, Lyoprotectant concentration, Bacterial concentration

#### Post Hoc Comparisons - Annealing

|    |     | Mean Difference | SE    | t     | p <sub>tukey</sub> |
|----|-----|-----------------|-------|-------|--------------------|
| No | Yes | 1.450           | 2.133 | 0.680 | 0.500              |

*Note.* Results are averaged over the levels of: Lyoprotectant, Lyoprotectant concentration, Bacterial concentration

#### Post Hoc Comparisons - Lyoprotectant concentration

|    |    | Mean Difference | SE    | t     | p <sub>tukey</sub> |
|----|----|-----------------|-------|-------|--------------------|
| 10 | 15 | 1.160           | 2.542 | 0.456 | 0.892              |
|    | 20 | 4.438           | 2.681 | 1.655 | 0.235              |
| 15 | 20 | 3.278           | 2.602 | 1.260 | 0.426              |

*Note.* P-value adjusted for comparing a family of 3

*Note.* Results are averaged over the levels of: Lyoprotectant, Annealing, Bacterial concentration

#### Post Hoc Comparisons - Bacterial concentration

|     |    | Mean Difference | SE    | t     | p <sub>tukey</sub> |
|-----|----|-----------------|-------|-------|--------------------|
| E10 | E9 | 5.743           | 2.125 | 2.703 | 0.010 **           |

\*\* p < .01

*Note.* Results are averaged over the levels of: Lyoprotectant, Annealing, Lyoprotectant concentration

#### Post Hoc Comparisons - Lyoprotectant \* Annealing

|              |               | Mean Difference | SE    | t       | p <sub>tukey</sub> |
|--------------|---------------|-----------------|-------|---------|--------------------|
| Sucrose No   | Trehalose No  | -34.415         | 3.157 | -10.900 | < .001 ***         |
|              | Sucrose Yes   | 0.838           | 3.015 | 0.278   | 0.992              |
|              | Trehalose Yes | -32.353         | 3.002 | -10.777 | < .001 ***         |
| Trehalose No | Sucrose Yes   | 35.253          | 3.015 | 11.693  | < .001 ***         |
|              | Trehalose Yes | 2.062           | 3.002 | 0.687   | 0.902              |

### Post Hoc Comparisons - Lyoprotectant \* Annealing

|             |               | Mean Difference | SE    | t       | p <sub>tukey</sub> |
|-------------|---------------|-----------------|-------|---------|--------------------|
| Sucrose Yes | Trehalose Yes | -33.191         | 2.836 | -11.705 | < .001 ***         |

\*\*\* p < .001

*Note.* P-value adjusted for comparing a family of 4

*Note.* Results are averaged over the levels of: Lyoprotectant concentration, Bacterial concentration

### Post Hoc Comparisons - Lyoprotectant \* Lyoprotectant concentration

|              |              | Mean Difference | SE    | t      | p <sub>tukey</sub> |
|--------------|--------------|-----------------|-------|--------|--------------------|
| Sucrose 10   | Trehalose 10 | -30.949         | 3.714 | -8.333 | < .001 ***         |
|              | Sucrose 15   | 2.214           | 3.602 | 0.615  | 0.989              |
|              | Trehalose 15 | -30.844         | 3.711 | -8.312 | < .001 ***         |
|              | Sucrose 20   | 7.664           | 3.867 | 1.982  | 0.370              |
| Trehalose 10 | Trehalose 20 | -29.738         | 3.867 | -7.690 | < .001 ***         |
|              | Sucrose 15   | 33.163          | 3.456 | 9.597  | < .001 ***         |
|              | Trehalose 15 | 0.105           | 3.524 | 0.030  | 1.000              |
|              | Sucrose 20   | 38.613          | 3.714 | 10.396 | < .001 ***         |
| Sucrose 15   | Trehalose 20 | 1.212           | 3.714 | 0.326  | 0.999              |
|              | Trehalose 15 | -33.059         | 3.385 | -9.767 | < .001 ***         |
|              | Sucrose 20   | 5.449           | 3.602 | 1.513  | 0.658              |
|              | Trehalose 20 | -31.952         | 3.602 | -8.871 | < .001 ***         |
| Trehalose 15 | Sucrose 20   | 38.508          | 3.711 | 10.377 | < .001 ***         |
|              | Trehalose 20 | 1.107           | 3.711 | 0.298  | 1.000              |
| Sucrose 20   | Trehalose 20 | -37.401         | 3.867 | -9.672 | < .001 ***         |

\*\*\* p < .001

*Note.* P-value adjusted for comparing a family of 6

*Note.* Results are averaged over the levels of: Annealing, Bacterial concentration

### Post Hoc Comparisons - Lyoprotectant \* Bacterial concentration

|               |               | Mean Difference | SE    | t       | p <sub>tukey</sub> |
|---------------|---------------|-----------------|-------|---------|--------------------|
| Sucrose E10   | Trehalose E10 | -31.530         | 2.866 | -11.001 | < .001 ***         |
|               | Sucrose E9    | 8.016           | 2.979 | 2.691   | 0.048 *            |
|               | Trehalose E9  | -28.060         | 3.050 | -9.200  | < .001 ***         |
| Trehalose E10 | Sucrose E9    | 39.546          | 2.955 | 13.382  | < .001 ***         |
|               | Trehalose E9  | 3.470           | 3.002 | 1.156   | 0.658              |
| Sucrose E9    | Trehalose E9  | -36.076         | 3.106 | -11.614 | < .001 ***         |

\* p < .05, \*\*\* p < .001

*Note.* P-value adjusted for comparing a family of 4

*Note.* Results are averaged over the levels of: Annealing, Lyoprotectant concentration



# **Post Hoc Comparisons - Lyoprotectant \* Annealing \* Bacterial concentration**

|                   |                   | Mean Difference | SE    | t      | p <sub>Tukey</sub> |
|-------------------|-------------------|-----------------|-------|--------|--------------------|
| Sucrose No E10    | Trehalose No E10  | -34.455         | 4.337 | -7.944 | < .001 ***         |
|                   | Sucrose Yes E10   | 6.399           | 4.102 | 1.560  | 0.770              |
|                   | Trehalose Yes E10 | -24.475         | 3.951 | -6.195 | < .001 ***         |
|                   | Sucrose No E9     | 12.522          | 4.337 | 2.887  | 0.107              |
|                   | Trehalose No E9   | -21.853         | 4.337 | -5.038 | < .001 ***         |
|                   | Sucrose Yes E9    | 8.743           | 4.211 | 2.076  | 0.450              |
|                   | Trehalose Yes E9  | -28.923         | 4.337 | -6.668 | < .001 ***         |
| Trehalose No E10  | Sucrose Yes E10   | 40.854          | 4.102 | 9.960  | < .001 ***         |
|                   | Trehalose Yes E10 | 9.980           | 3.951 | 2.526  | 0.219              |
|                   | Sucrose No E9     | 46.977          | 4.337 | 10.831 | < .001 ***         |
|                   | Trehalose No E9   | 12.602          | 4.337 | 2.905  | 0.103              |
|                   | Sucrose Yes E9    | 43.198          | 4.211 | 10.258 | < .001 ***         |
|                   | Trehalose Yes E9  | 5.532           | 4.337 | 1.275  | 0.902              |
|                   |                   |                 |       |        |                    |
| Sucrose Yes E10   | Trehalose Yes E10 | -30.874         | 3.679 | -8.393 | < .001 ***         |
|                   | Sucrose No E9     | 6.123           | 4.102 | 1.493  | 0.806              |
|                   | Trehalose No E9   | -28.252         | 4.102 | -6.888 | < .001 ***         |
|                   | Sucrose Yes E9    | 2.344           | 3.953 | 0.593  | 0.999              |
|                   | Trehalose Yes E9  | -35.322         | 4.102 | -8.612 | < .001 ***         |
| Trehalose Yes E10 | Sucrose No E9     | 36.997          | 3.951 | 9.364  | < .001 ***         |
|                   | Trehalose No E9   | 2.622           | 3.951 | 0.664  | 0.997              |
|                   | Sucrose Yes E9    | 33.217          | 3.818 | 8.700  | < .001 ***         |
|                   | Trehalose Yes E9  | -4.448          | 3.951 | -1.126 | 0.946              |
| Sucrose No E9     | Trehalose No E9   | -34.375         | 4.337 | -7.925 | < .001 ***         |
|                   | Sucrose Yes E9    | -3.779          | 4.211 | -0.897 | 0.984              |
|                   | Trehalose Yes E9  | -41.445         | 4.337 | -9.555 | < .001 ***         |
| Trehalose No E9   | Sucrose Yes E9    | 30.596          | 4.211 | 7.265  | < .001 ***         |
|                   | Trehalose Yes E9  | -7.070          | 4.337 | -1.630 | 0.729              |
| Sucrose Yes E9    | Trehalose Yes E9  | -37.666         | 4.211 | -8.944 | < .001 ***         |

\*\* p < .01, \*\*\* p < .001

*Note.* P-value adjusted for comparing a family of 8

*Note.* Results are averaged over the levels of: Lyoprotectant concentration

**Table S5.** Tukey post-hoc tests: effects and interactions of the factors on aggregation of freeze-dried R2LC

## Post Hoc Tests-Aggregation

### Standard

#### Post Hoc Comparisons - Lyoprotectant

|         |           | Mean Difference | SE    | t      | P <sub>tukey</sub> |
|---------|-----------|-----------------|-------|--------|--------------------|
| Sucrose | Trehalose | -0.139          | 0.060 | -2.329 | 0.022 *            |

\*  $p < .05$

*Note.* Results are averaged over the levels of: Annealing, Lyoprotectant concentration, Bacterial concentration

#### Post Hoc Comparisons - Annealing

|    |     | Mean Difference | SE    | t     | P <sub>tukey</sub> |
|----|-----|-----------------|-------|-------|--------------------|
| No | Yes | 0.089           | 0.060 | 1.500 | 0.137              |

*Note.* Results are averaged over the levels of: Lyoprotectant, Lyoprotectant concentration, Bacterial concentration

#### Post Hoc Comparisons - Lyoprotectant concentration

|    |    | Mean Difference | SE    | t      | P <sub>tukey</sub> |
|----|----|-----------------|-------|--------|--------------------|
| 10 | 15 | -0.142          | 0.073 | -1.958 | 0.129              |
|    | 20 | 0.118           | 0.073 | 1.607  | 0.248              |
| 15 | 20 | 0.260           | 0.073 | 3.576  | 0.002 **           |

\*\*  $p < .01$

*Note.* P-value adjusted for comparing a family of 3

*Note.* Results are averaged over the levels of: Lyoprotectant, Annealing, Bacterial concentration

#### Post Hoc Comparisons - Bacterial concentration

|     |    | Mean Difference | SE    | t      | P <sub>tukey</sub> |
|-----|----|-----------------|-------|--------|--------------------|
| E10 | E9 | 1.488           | 0.060 | 25.012 | < .001 ***         |

\*\*\*  $p < .001$

*Note.* Results are averaged over the levels of: Lyoprotectant, Annealing, Lyoprotectant concentration

#### Post Hoc Comparisons - Lyoprotectant \* Annealing

|              |               | Mean Difference | SE    | t      | P <sub>tukey</sub> |
|--------------|---------------|-----------------|-------|--------|--------------------|
| Sucrose No   | Trehalose No  | -0.355          | 0.084 | -4.232 | < .001 ***         |
|              | Sucrose Yes   | -0.127          | 0.084 | -1.512 | 0.435              |
|              | Trehalose Yes | -0.049          | 0.084 | -0.589 | 0.935              |
| Trehalose No | Sucrose Yes   | 0.228           | 0.085 | 2.695  | 0.042 *            |

### Post Hoc Comparisons - Lyoprotectant \* Annealing

|             |               | Mean Difference | SE    | t     | P <sub>Tukey</sub> |
|-------------|---------------|-----------------|-------|-------|--------------------|
| Sucrose Yes | Trehalose Yes | 0.305           | 0.085 | 3.610 | 0.003 **           |
|             | Trehalose Yes | 0.077           | 0.085 | 0.914 | 0.797              |

\*  $p < .05$ , \*\*  $p < .01$ , \*\*\*  $p < .001$

*Note.* P-value adjusted for comparing a family of 4

*Note.* Results are averaged over the levels of: Lyoprotectant concentration, Bacterial concentration

### Post Hoc Comparisons - Lyoprotectant \* Lyoprotectant concentration

|              |              | Mean Difference | SE    | t      | P <sub>Tukey</sub> |
|--------------|--------------|-----------------|-------|--------|--------------------|
| Sucrose 10   | Trehalose 10 | -0.166          | 0.104 | -1.608 | 0.596              |
|              | Sucrose 15   | -0.224          | 0.102 | -2.194 | 0.252              |
|              | Trehalose 15 | -0.227          | 0.104 | -2.194 | 0.252              |
|              | Sucrose 20   | 0.158           | 0.104 | 1.521  | 0.652              |
|              | Trehalose 20 | -0.089          | 0.104 | -0.857 | 0.956              |
| Trehalose 10 | Sucrose 15   | -0.058          | 0.102 | -0.563 | 0.993              |
|              | Trehalose 15 | -0.061          | 0.104 | -0.586 | 0.992              |
|              | Sucrose 20   | 0.324           | 0.104 | 3.129  | 0.028 *            |
|              | Trehalose 20 | 0.078           | 0.104 | 0.752  | 0.975              |
| Sucrose 15   | Trehalose 15 | -0.003          | 0.102 | -0.031 | 1.000              |
|              | Sucrose 20   | 0.382           | 0.102 | 3.736  | 0.005 **           |
|              | Trehalose 20 | 0.135           | 0.102 | 1.325  | 0.770              |
| Trehalose 15 | Sucrose 20   | 0.385           | 0.104 | 3.715  | 0.005 **           |
|              | Trehalose 20 | 0.138           | 0.104 | 1.338  | 0.763              |
| Sucrose 20   | Trehalose 20 | -0.246          | 0.104 | -2.378 | 0.176              |

\*  $p < .05$ , \*\*  $p < .01$

*Note.* P-value adjusted for comparing a family of 6

*Note.* Results are averaged over the levels of: Annealing, Bacterial concentration

### Post Hoc Comparisons - Lyoprotectant \* Bacterial concentration

|               |               | Mean Difference | SE    | t      | P <sub>Tukey</sub> |
|---------------|---------------|-----------------|-------|--------|--------------------|
| Sucrose E10   | Trehalose E10 | 0.028           | 0.085 | 0.333  | 0.987              |
|               | Sucrose E9    | 1.655           | 0.084 | 19.757 | < .001 ***         |
|               | Trehalose E9  | 1.350           | 0.085 | 15.966 | < .001 ***         |
| Trehalose E10 | Sucrose E9    | 1.627           | 0.084 | 19.421 | < .001 ***         |
|               | Trehalose E9  | 1.322           | 0.085 | 15.634 | < .001 ***         |
| Sucrose E9    | Trehalose E9  | -0.305          | 0.084 | -3.645 | 0.003 **           |

\*\*  $p < .01$ , \*\*\*  $p < .001$

*Note.* P-value adjusted for comparing a family of 4

*Note.* Results are averaged over the levels of: Annealing, Lyoprotectant concentration

**Table S6.** Porosity of freeze-dried R2LC and an ANOVA and Tukey post-hoc tests: effects and interactions of the factors on porosity of freeze-dried R2LC

| S.No. | Lyoprotectant | Lyoprotectant concentration (%) | Bacterial concentration (CFU/mL) | Annealing | Porosity (%) |
|-------|---------------|---------------------------------|----------------------------------|-----------|--------------|
| 1     | Trehalose     | 10                              | $10^9$                           | Yes       | 10.2         |
| 2     | Sucrose       | 10                              | $10^9$                           | Yes       | 13.42        |
| 3     | Trehalose     | 10                              | $10^9$                           | No        | 10.96        |
| 4     | Sucrose       | 10                              | $10^9$                           | No        | 33.5         |
| 5     | Trehalose     | 20                              | $10^9$                           | Yes       | 10.51        |
| 6     | Sucrose       | 20                              | $10^9$                           | Yes       | 10.26        |
| 7     | Trehalose     | 20                              | $10^9$                           | No        | 9.72         |
| 8     | Sucrose       | 20                              | $10^9$                           | No        | 13.47        |
| 9     | Trehalose     | 10                              | $10^{10}$                        | Yes       | 9.58         |
| 10    | Sucrose       | 10                              | $10^{10}$                        | Yes       | 18.91        |
| 11    | Trehalose     | 10                              | $10^{10}$                        | No        | 17.29        |
| 12    | Sucrose       | 10                              | $10^{10}$                        | No        | 9.43         |
| 13    | Trehalose     | 20                              | $10^{10}$                        | Yes       | 20.48        |
| 14    | Sucrose       | 20                              | $10^{10}$                        | Yes       | 15.54        |
| 15    | Trehalose     | 20                              | $10^{10}$                        | No        | 17.7         |
| 16    | Sucrose       | 20                              | $10^{10}$                        | No        | 13.66        |
| 17    | Trehalose     | 15                              | $10^9$                           | Yes       | 11.61        |
| 18    | Sucrose       | 15                              | $10^9$                           | Yes       | 12.38        |
| 19    | Trehalose     | 15                              | $10^9$                           | No        | 16.92        |
| 20    | Sucrose       | 15                              | $10^9$                           | No        | 11.99        |
| 21    | Trehalose     | 15                              | $10^{10}$                        | Yes       | 12.83        |
| 22    | Sucrose       | 15                              | $10^{10}$                        | Yes       | 28.44        |
| 23    | Trehalose     | 15                              | $10^{10}$                        | No        | 15.99        |
| 24    | Sucrose       | 15                              | $10^{10}$                        | No        | 12.93        |

## ANOVA - Porosity

| Cases                                                                 | Sum of Squares | df | Mean Square | F                      | p     | $\eta^2_p$             |
|-----------------------------------------------------------------------|----------------|----|-------------|------------------------|-------|------------------------|
| Lyoprotectant                                                         | 64.092         | 1  | 64.092      | 1.740                  | 0.318 | 0.465                  |
| Annealing                                                             | 0.004          | 1  | 0.004       | $1.159 \times 10^{-4}$ | 0.992 | $5.792 \times 10^{-5}$ |
| Lyoprotectant concentration                                           | 11.704         | 2  | 5.852       | 0.159                  | 0.863 | 0.137                  |
| Bacterial concentration                                               | 32.294         | 1  | 32.294      | 0.877                  | 0.448 | 0.305                  |
| Lyoprotectant * Annealing                                             | 12.528         | 1  | 12.528      | 0.340                  | 0.619 | 0.145                  |
| Lyoprotectant * Lyoprotectant concentration                           | 70.496         | 2  | 35.248      | 0.957                  | 0.511 | 0.489                  |
| Annealing * Lyoprotectant concentration                               | 80.154         | 2  | 40.077      | 1.088                  | 0.479 | 0.521                  |
| Lyoprotectant * Annealing * Lyoprotectant concentration               | 65.277         | 2  | 32.639      | 0.886                  | 0.530 | 0.470                  |
| Lyoprotectant * Bacterial concentration                               | 35.381         | 1  | 35.381      | 0.961                  | 0.430 | 0.324                  |
| Annealing * Bacterial concentration                                   | 59.787         | 1  | 59.787      | 1.623                  | 0.331 | 0.448                  |
| Lyoprotectant concentration * Bacterial concentration                 | 94.340         | 2  | 47.170      | 1.281                  | 0.438 | 0.562                  |
| Lyoprotectant * Annealing * Bacterial concentration                   | 115.194        | 1  | 115.194     | 3.128                  | 0.219 | 0.610                  |
| Lyoprotectant * Lyoprotectant concentration * Bacterial concentration | 65.116         | 2  | 32.558      | 0.884                  | 0.531 | 0.469                  |
| Annealing * Lyoprotectant concentration * Bacterial concentration     | 18.765         | 2  | 9.382       | 0.255                  | 0.797 | 0.203                  |
| Residuals                                                             | 73.657         | 2  | 36.829      |                        |       |                        |

Note. Type III Sum of Squares

## Post Hoc Tests-porosity

### Standard

#### Post Hoc Comparisons - Lyoprotectant

|                        | Mean Difference | SE    | t     | p <sub>tukey</sub> |
|------------------------|-----------------|-------|-------|--------------------|
| Sucrose      Trehalose | 3.268           | 2.478 | 1.319 | 0.318              |

Note. Results are averaged over the levels of: Annealing, Lyoprotectant concentration, Bacterial concentration

#### Post Hoc Comparisons - Annealing

|             | Mean Difference | SE    | t     | p <sub>tukey</sub> |
|-------------|-----------------|-------|-------|--------------------|
| No      Yes | 0.027           | 2.478 | 0.011 | 0.992              |

**Post Hoc Comparisons - Annealing**

|  |  | Mean Difference | SE | t | p <sub>Tukey</sub> |
|--|--|-----------------|----|---|--------------------|
|--|--|-----------------|----|---|--------------------|

*Note.* Results are averaged over the levels of: Lyoprotectant, Lyoprotectant concentration, Bacterial concentration

**Post Hoc Comparisons - Lyoprotectant concentration**

|  |  | Mean Difference | SE | t | p <sub>Tukey</sub> |
|--|--|-----------------|----|---|--------------------|
|--|--|-----------------|----|---|--------------------|

|    |    |       |       |       |       |
|----|----|-------|-------|-------|-------|
| 10 | 15 | 0.025 | 3.034 | 0.008 | 1.000 |
|    | 20 | 1.494 | 3.034 | 0.492 | 0.882 |
| 15 | 20 | 1.469 | 3.034 | 0.484 | 0.886 |

*Note.* P-value adjusted for comparing a family of 3

*Note.* Results are averaged over the levels of: Lyoprotectant, Annealing, Bacterial concentration

**Post Hoc Comparisons - Bacterial concentration**

|  |  | Mean Difference | SE | t | p <sub>Tukey</sub> |
|--|--|-----------------|----|---|--------------------|
|--|--|-----------------|----|---|--------------------|

|     |    |       |       |       |       |
|-----|----|-------|-------|-------|-------|
| E10 | E9 | 2.320 | 2.478 | 0.936 | 0.448 |
|-----|----|-------|-------|-------|-------|

*Note.* Results are averaged over the levels of: Lyoprotectant, Annealing, Lyoprotectant concentration

**Post Hoc Comparisons - Lyoprotectant \* Annealing**

|  |  | Mean Difference | SE | t | p <sub>Tukey</sub> |
|--|--|-----------------|----|---|--------------------|
|--|--|-----------------|----|---|--------------------|

|              |               |        |       |        |       |
|--------------|---------------|--------|-------|--------|-------|
| Sucrose No   | Trehalose No  | 1.823  | 3.504 | 0.520  | 0.947 |
|              | Sucrose Yes   | -1.418 | 3.504 | -0.405 | 0.973 |
|              | Trehalose Yes | 3.295  | 3.504 | 0.940  | 0.794 |
| Trehalose No | Sucrose Yes   | -3.242 | 3.504 | -0.925 | 0.800 |
|              | Trehalose Yes | 1.472  | 3.504 | 0.420  | 0.970 |
| Sucrose Yes  | Trehalose Yes | 4.713  | 3.504 | 1.345  | 0.623 |

*Note.* P-value adjusted for comparing a family of 4

*Note.* Results are averaged over the levels of: Lyoprotectant concentration, Bacterial concentration

**Post Hoc Comparisons - Lyoprotectant \* Lyoprotectant concentration**

|  |  | Mean Difference | SE | t | p <sub>Tukey</sub> |
|--|--|-----------------|----|---|--------------------|
|--|--|-----------------|----|---|--------------------|

|              |              |        |       |        |       |
|--------------|--------------|--------|-------|--------|-------|
| Sucrose 10   | Trehalose 10 | 6.807  | 4.291 | 1.586  | 0.670 |
|              | Sucrose 15   | 1.245  | 4.291 | 0.290  | 0.999 |
|              | Trehalose 15 | 5.612  | 4.291 | 1.308  | 0.775 |
|              | Sucrose 20   | 5.582  | 4.291 | 1.301  | 0.778 |
|              | Trehalose 20 | 4.212  | 4.291 | 0.982  | 0.893 |
| Trehalose 10 | Sucrose 15   | -5.562 | 4.291 | -1.296 | 0.780 |
|              | Trehalose 15 | -1.195 | 4.291 | -0.278 | 0.999 |
|              | Sucrose 20   | -1.225 | 4.291 | -0.285 | 0.999 |
|              | Trehalose 20 | -2.595 | 4.291 | -0.605 | 0.980 |
| Sucrose 15   | Trehalose 15 | 4.367  | 4.291 | 1.018  | 0.881 |

### Post Hoc Comparisons - Lyoprotectant \* Lyoprotectant concentration

|              |              | Mean Difference | SE    | t      | P <sub>Tukey</sub> |
|--------------|--------------|-----------------|-------|--------|--------------------|
| Trehalose 15 | Sucrose 20   | 4.337           | 4.291 | 1.011  | 0.883              |
|              | Trehalose 20 | 2.967           | 4.291 | 0.692  | 0.966              |
|              | Sucrose 20   | -0.030          | 4.291 | -0.007 | 1.000              |
|              | Trehalose 20 | -1.400          | 4.291 | -0.326 | 0.999              |
| Sucrose 20   | Trehalose 20 | -1.370          | 4.291 | -0.319 | 0.999              |

*Note.* P-value adjusted for comparing a family of 6

*Note.* Results are averaged over the levels of: Annealing, Bacterial concentration

### Post Hoc Comparisons - Lyoprotectant \* Annealing \* Lyoprotectant concentration

|                  |                  | Mean Difference | SE    | t      | P <sub>Tukey</sub> |
|------------------|------------------|-----------------|-------|--------|--------------------|
| Sucrose No 10    | Trehalose No 10  | 7.340           | 6.069 | 1.209  | 0.939              |
|                  | Sucrose Yes 10   | 5.300           | 6.069 | 0.873  | 0.988              |
|                  | Trehalose Yes 10 | 11.575          | 6.069 | 1.907  | 0.734              |
|                  | Sucrose No 15    | 9.005           | 6.069 | 1.484  | 0.868              |
|                  | Trehalose No 15  | 7.280           | 6.069 | 1.200  | 0.941              |
|                  | Sucrose Yes 15   | -1.215          | 6.069 | -0.200 | 1.000              |
|                  | Trehalose Yes 15 | 9.245           | 6.069 | 1.523  | 0.856              |
|                  | Sucrose No 20    | 7.900           | 6.069 | 1.302  | 0.917              |
|                  | Trehalose No 20  | 7.755           | 6.069 | 1.278  | 0.923              |
|                  | Sucrose Yes 20   | 8.565           | 6.069 | 1.411  | 0.889              |
|                  | Trehalose Yes 20 | 5.970           | 6.069 | 0.984  | 0.977              |
| Trehalose No 10  | Sucrose Yes 10   | -2.040          | 6.069 | -0.336 | 1.000              |
|                  | Trehalose Yes 10 | 4.235           | 6.069 | 0.698  | 0.997              |
|                  | Sucrose No 15    | 1.665           | 6.069 | 0.274  | 1.000              |
|                  | Trehalose No 15  | -0.060          | 6.069 | -0.010 | 1.000              |
|                  | Sucrose Yes 15   | -8.555          | 6.069 | -1.410 | 0.889              |
|                  | Trehalose Yes 15 | 1.905           | 6.069 | 0.314  | 1.000              |
|                  | Sucrose No 20    | 0.560           | 6.069 | 0.092  | 1.000              |
|                  | Trehalose No 20  | 0.415           | 6.069 | 0.068  | 1.000              |
|                  | Sucrose Yes 20   | 1.225           | 6.069 | 0.202  | 1.000              |
|                  | Trehalose Yes 20 | -1.370          | 6.069 | -0.226 | 1.000              |
| Sucrose Yes 10   | Trehalose Yes 10 | 6.275           | 6.069 | 1.034  | 0.970              |
|                  | Sucrose No 15    | 3.705           | 6.069 | 0.611  | 0.999              |
|                  | Trehalose No 15  | 1.980           | 6.069 | 0.326  | 1.000              |
|                  | Sucrose Yes 15   | -6.515          | 6.069 | -1.074 | 0.964              |
|                  | Trehalose Yes 15 | 3.945           | 6.069 | 0.650  | 0.998              |
|                  | Sucrose No 20    | 2.600           | 6.069 | 0.428  | 1.000              |
|                  | Trehalose No 20  | 2.455           | 6.069 | 0.405  | 1.000              |
|                  | Sucrose Yes 20   | 3.265           | 6.069 | 0.538  | 1.000              |
| Trehalose Yes 10 | Trehalose Yes 20 | 0.670           | 6.069 | 0.110  | 1.000              |
|                  | Sucrose No 15    | -2.570          | 6.069 | -0.423 | 1.000              |
|                  | Trehalose No 15  | -4.295          | 6.069 | -0.708 | 0.997              |

### Post Hoc Comparisons - Lyoprotectant \* Annealing \* Lyoprotectant concentration

|                  |                  | Mean Difference | SE    | t      | P <sub>tukey</sub> |
|------------------|------------------|-----------------|-------|--------|--------------------|
| Sucrose No 15    | Sucrose Yes 15   | -12.790         | 6.069 | -2.108 | 0.671              |
|                  | Trehalose Yes 15 | -2.330          | 6.069 | -0.384 | 1.000              |
|                  | Sucrose No 20    | -3.675          | 6.069 | -0.606 | 0.999              |
|                  | Trehalose No 20  | -3.820          | 6.069 | -0.629 | 0.999              |
|                  | Sucrose Yes 20   | -3.010          | 6.069 | -0.496 | 1.000              |
|                  | Trehalose Yes 20 | -5.605          | 6.069 | -0.924 | 0.984              |
| Trehalose No 15  | Trehalose No 15  | -1.725          | 6.069 | -0.284 | 1.000              |
|                  | Sucrose Yes 15   | -10.220         | 6.069 | -1.684 | 0.806              |
|                  | Trehalose Yes 15 | 0.240           | 6.069 | 0.040  | 1.000              |
|                  | Sucrose No 20    | -1.105          | 6.069 | -0.182 | 1.000              |
|                  | Trehalose No 20  | -1.250          | 6.069 | -0.206 | 1.000              |
|                  | Sucrose Yes 20   | -0.440          | 6.069 | -0.073 | 1.000              |
| Sucrose Yes 15   | Trehalose Yes 20 | -3.035          | 6.069 | -0.500 | 1.000              |
|                  | Sucrose Yes 15   | -8.495          | 6.069 | -1.400 | 0.892              |
|                  | Trehalose Yes 15 | 1.965           | 6.069 | 0.324  | 1.000              |
|                  | Sucrose No 20    | 0.620           | 6.069 | 0.102  | 1.000              |
|                  | Trehalose No 20  | 0.475           | 6.069 | 0.078  | 1.000              |
|                  | Sucrose Yes 20   | 1.285           | 6.069 | 0.212  | 1.000              |
| Trehalose Yes 15 | Trehalose Yes 20 | -1.310          | 6.069 | -0.216 | 1.000              |
|                  | Trehalose Yes 15 | 10.460          | 6.069 | 1.724  | 0.794              |
|                  | Sucrose No 20    | 9.115           | 6.069 | 1.502  | 0.863              |
|                  | Trehalose No 20  | 8.970           | 6.069 | 1.478  | 0.870              |
|                  | Sucrose Yes 20   | 9.780           | 6.069 | 1.612  | 0.829              |
|                  | Trehalose Yes 20 | 7.185           | 6.069 | 1.184  | 0.944              |
| Sucrose No 20    | Sucrose No 20    | -1.345          | 6.069 | -0.222 | 1.000              |
|                  | Trehalose No 20  | -1.490          | 6.069 | -0.246 | 1.000              |
|                  | Sucrose Yes 20   | -0.680          | 6.069 | -0.112 | 1.000              |
|                  | Trehalose Yes 20 | -3.275          | 6.069 | -0.540 | 1.000              |
|                  | Trehalose No 20  | -0.145          | 6.069 | -0.024 | 1.000              |
|                  | Sucrose Yes 20   | 0.665           | 6.069 | 0.110  | 1.000              |
| Trehalose No 20  | Trehalose Yes 20 | -1.930          | 6.069 | -0.318 | 1.000              |
|                  | Sucrose Yes 20   | 0.810           | 6.069 | 0.133  | 1.000              |
|                  | Trehalose Yes 20 | -1.785          | 6.069 | -0.294 | 1.000              |
|                  | Sucrose Yes 20   | -2.595          | 6.069 | -0.428 | 1.000              |
|                  | Trehalose Yes 20 |                 |       |        |                    |
|                  | Trehalose Yes 20 |                 |       |        |                    |

Note. P-value adjusted for comparing a family of 12

Note. Results are averaged over the levels of: Bacterial concentration

### Post Hoc Comparisons - Lyoprotectant \* Bacterial concentration

|             |               | Mean Difference | SE    | t      | P <sub>tukey</sub> |
|-------------|---------------|-----------------|-------|--------|--------------------|
| Sucrose E10 | Trehalose E10 | 0.840           | 3.504 | 0.240  | 0.994              |
|             | Sucrose E9    | -0.108          | 3.504 | -0.031 | 1.000              |
|             | Trehalose E9  | 5.588           | 3.504 | 1.595  | 0.529              |



### Post Hoc Comparisons - Lyoprotectant \* Bacterial concentration

|               |              | Mean Difference | SE    | t      | P <sub>Tukey</sub> |
|---------------|--------------|-----------------|-------|--------|--------------------|
| Trehalose E10 | Sucrose E9   | -0.948          | 3.504 | -0.271 | 0.991              |
|               | Trehalose E9 | 4.748           | 3.504 | 1.355  | 0.619              |
| Sucrose E9    | Trehalose E9 | 5.697           | 3.504 | 1.626  | 0.518              |

*Note.* P-value adjusted for comparing a family of 4

*Note.* Results are averaged over the levels of: Annealing, Lyoprotectant concentration

### Post Hoc Comparisons - Lyoprotectant \* Annealing \* Bacterial concentration

|                   |                   | Mean Difference | SE    | t      | P <sub>Tukey</sub> |
|-------------------|-------------------|-----------------|-------|--------|--------------------|
| Sucrose No E10    | Trehalose No E10  | -4.987          | 4.955 | -1.006 | 0.935              |
|                   | Sucrose Yes E10   | -8.957          | 4.955 | -1.808 | 0.673              |
|                   | Trehalose Yes E10 | -2.290          | 4.955 | -0.462 | 0.999              |
|                   | Sucrose No E9     | -7.647          | 4.955 | -1.543 | 0.765              |
|                   | Trehalose No E9   | 0.987           | 4.955 | 0.199  | 1.000              |
|                   | Sucrose Yes E9    | -1.527          | 4.955 | -0.308 | 1.000              |
|                   | Trehalose Yes E9  | 1.233           | 4.955 | 0.249  | 1.000              |
| Trehalose No E10  | Sucrose Yes E10   | -3.970          | 4.955 | -0.801 | 0.975              |
|                   | Trehalose Yes E10 | 2.697           | 4.955 | 0.544  | 0.996              |
|                   | Sucrose No E9     | -2.660          | 4.955 | -0.537 | 0.997              |
|                   | Trehalose No E9   | 5.973           | 4.955 | 1.206  | 0.880              |
|                   | Sucrose Yes E9    | 3.460           | 4.955 | 0.698  | 0.987              |
|                   | Trehalose Yes E9  | 6.220           | 4.955 | 1.255  | 0.864              |
| Sucrose Yes E10   | Trehalose Yes E10 | 6.667           | 4.955 | 1.345  | 0.834              |
|                   | Sucrose No E9     | 1.310           | 4.955 | 0.264  | 1.000              |
|                   | Trehalose No E9   | 9.943           | 4.955 | 2.007  | 0.607              |
|                   | Sucrose Yes E9    | 7.430           | 4.955 | 1.499  | 0.781              |
|                   | Trehalose Yes E9  | 10.190          | 4.955 | 2.056  | 0.592              |
| Trehalose Yes E10 | Sucrose No E9     | -5.357          | 4.955 | -1.081 | 0.916              |
|                   | Trehalose No E9   | 3.277           | 4.955 | 0.661  | 0.990              |
|                   | Sucrose Yes E9    | 0.763           | 4.955 | 0.154  | 1.000              |
|                   | Trehalose Yes E9  | 3.523           | 4.955 | 0.711  | 0.985              |
| Sucrose No E9     | Trehalose No E9   | 8.633           | 4.955 | 1.742  | 0.695              |
|                   | Sucrose Yes E9    | 6.120           | 4.955 | 1.235  | 0.871              |
|                   | Trehalose Yes E9  | 8.880           | 4.955 | 1.792  | 0.678              |
| Trehalose No E9   | Sucrose Yes E9    | -2.513          | 4.955 | -0.507 | 0.998              |
|                   | Trehalose Yes E9  | 0.247           | 4.955 | 0.050  | 1.000              |
| Sucrose Yes E9    | Trehalose Yes E9  | 2.760           | 4.955 | 0.557  | 0.996              |

*Note.* P-value adjusted for comparing a family of 8

*Note.* Results are averaged over the levels of: Lyoprotectant concentration

**Post Hoc Comparisons - Lyoprotectant \* Lyoprotectant concentration \* Bacterial concentration**

|                  |                  | <b>Mean<br/>Difference</b> | <b>SE</b> | <b>t</b> | <b>p<sub>tukey</sub></b> |
|------------------|------------------|----------------------------|-----------|----------|--------------------------|
| Sucrose 10 E10   | Trehalose 10 E10 | 0.735                      | 6.069     | 0.121    | 1.000                    |
|                  | Sucrose 15 E10   | -6.515                     | 6.069     | -1.074   | 0.964                    |
|                  | Trehalose 15 E10 | -0.240                     | 6.069     | -0.040   | 1.000                    |
|                  | Sucrose 20 E10   | -0.430                     | 6.069     | -0.071   | 1.000                    |
|                  | Trehalose 20 E10 | -4.920                     | 6.069     | -0.811   | 0.993                    |
|                  | Sucrose 10 E9    | -9.290                     | 6.069     | -1.531   | 0.854                    |
|                  | Trehalose 10 E9  | 3.590                      | 6.069     | 0.592    | 0.999                    |
|                  | Sucrose 15 E9    | -0.285                     | 6.069     | -0.047   | 1.000                    |
|                  | Trehalose 15 E9  | 2.175                      | 6.069     | 0.358    | 1.000                    |
|                  | Sucrose 20 E9    | 2.305                      | 6.069     | 0.380    | 1.000                    |
|                  | Trehalose 20 E9  | 4.055                      | 6.069     | 0.668    | 0.998                    |
| Trehalose 10 E10 | Sucrose 15 E10   | -7.250                     | 6.069     | -1.195   | 0.942                    |
|                  | Trehalose 15 E10 | -0.975                     | 6.069     | -0.161   | 1.000                    |
|                  | Sucrose 20 E10   | -1.165                     | 6.069     | -0.192   | 1.000                    |
|                  | Trehalose 20 E10 | -5.655                     | 6.069     | -0.932   | 0.983                    |
|                  | Sucrose 10 E9    | -10.025                    | 6.069     | -1.652   | 0.816                    |
|                  | Trehalose 10 E9  | 2.855                      | 6.069     | 0.470    | 1.000                    |
|                  | Sucrose 15 E9    | -1.020                     | 6.069     | -0.168   | 1.000                    |
|                  | Trehalose 15 E9  | 1.440                      | 6.069     | 0.237    | 1.000                    |
|                  | Sucrose 20 E9    | 1.570                      | 6.069     | 0.259    | 1.000                    |
|                  | Trehalose 20 E9  | 3.320                      | 6.069     | 0.547    | 1.000                    |
| Sucrose 15 E10   | Trehalose 15 E10 | 6.275                      | 6.069     | 1.034    | 0.970                    |
|                  | Sucrose 20 E10   | 6.085                      | 6.069     | 1.003    | 0.975                    |
|                  | Trehalose 20 E10 | 1.595                      | 6.069     | 0.263    | 1.000                    |
|                  | Sucrose 10 E9    | -2.775                     | 6.069     | -0.457   | 1.000                    |
|                  | Trehalose 10 E9  | 10.105                     | 6.069     | 1.665    | 0.812                    |
|                  | Sucrose 15 E9    | 6.230                      | 6.069     | 1.027    | 0.971                    |
|                  | Trehalose 15 E9  | 8.690                      | 6.069     | 1.432    | 0.883                    |
|                  | Sucrose 20 E9    | 8.820                      | 6.069     | 1.453    | 0.877                    |
|                  | Trehalose 20 E9  | 10.570                     | 6.069     | 1.742    | 0.788                    |
| Trehalose 15 E10 | Sucrose 20 E10   | -0.190                     | 6.069     | -0.031   | 1.000                    |
|                  | Trehalose 20 E10 | -4.680                     | 6.069     | -0.771   | 0.995                    |
|                  | Sucrose 10 E9    | -9.050                     | 6.069     | -1.491   | 0.866                    |
|                  | Trehalose 10 E9  | 3.830                      | 6.069     | 0.631    | 0.999                    |
|                  | Sucrose 15 E9    | -0.045                     | 6.069     | -0.007   | 1.000                    |
|                  | Trehalose 15 E9  | 2.415                      | 6.069     | 0.398    | 1.000                    |
|                  | Sucrose 20 E9    | 2.545                      | 6.069     | 0.419    | 1.000                    |
|                  | Trehalose 20 E9  | 4.295                      | 6.069     | 0.708    | 0.997                    |
| Sucrose 20 E10   | Trehalose 20 E10 | -4.490                     | 6.069     | -0.740   | 0.996                    |
|                  | Sucrose 10 E9    | -8.860                     | 6.069     | -1.460   | 0.875                    |
|                  | Trehalose 10 E9  | 4.020                      | 6.069     | 0.662    | 0.998                    |

**Post Hoc Comparisons - Lyoprotectant \* Lyoprotectant concentration \* Bacterial concentration**

|                  |                 | <b>Mean<br/>Difference</b> | <b>SE</b> | <b>t</b> | <b>p<sub>tukey</sub></b> |
|------------------|-----------------|----------------------------|-----------|----------|--------------------------|
| Trehalose 20 E10 | Sucrose 15 E9   | 0.145                      | 6.069     | 0.024    | 1.000                    |
|                  | Trehalose 15 E9 | 2.605                      | 6.069     | 0.429    | 1.000                    |
|                  | Sucrose 20 E9   | 2.735                      | 6.069     | 0.451    | 1.000                    |
|                  | Trehalose 20 E9 | 4.485                      | 6.069     | 0.739    | 0.996                    |
|                  | Sucrose 10 E9   | -4.370                     | 6.069     | -0.720   | 0.997                    |
|                  | Trehalose 10 E9 | 8.510                      | 6.069     | 1.402    | 0.891                    |
| Sucrose 10 E9    | Sucrose 15 E9   | 4.635                      | 6.069     | 0.764    | 0.995                    |
|                  | Trehalose 15 E9 | 7.095                      | 6.069     | 1.169    | 0.947                    |
|                  | Sucrose 20 E9   | 7.225                      | 6.069     | 1.191    | 0.943                    |
|                  | Trehalose 20 E9 | 8.975                      | 6.069     | 1.479    | 0.869                    |
|                  | Trehalose 10 E9 | 12.880                     | 6.069     | 2.122    | 0.667                    |
|                  | Sucrose 15 E9   | 9.005                      | 6.069     | 1.484    | 0.868                    |
| Trehalose 10 E9  | Trehalose 15 E9 | 11.465                     | 6.069     | 1.889    | 0.740                    |
|                  | Sucrose 20 E9   | 11.595                     | 6.069     | 1.911    | 0.733                    |
|                  | Trehalose 20 E9 | 13.345                     | 6.069     | 2.199    | 0.644                    |
|                  | Sucrose 15 E9   | -3.875                     | 6.069     | -0.639   | 0.999                    |
|                  | Trehalose 15 E9 | -1.415                     | 6.069     | -0.233   | 1.000                    |
|                  | Sucrose 20 E9   | -1.285                     | 6.069     | -0.212   | 1.000                    |
| Sucrose 15 E9    | Trehalose 20 E9 | 0.465                      | 6.069     | 0.077    | 1.000                    |
|                  | Trehalose 15 E9 | 2.460                      | 6.069     | 0.405    | 1.000                    |
|                  | Sucrose 20 E9   | 2.590                      | 6.069     | 0.427    | 1.000                    |
|                  | Trehalose 20 E9 | 4.340                      | 6.069     | 0.715    | 0.997                    |
| Trehalose 15 E9  | Sucrose 20 E9   | 0.130                      | 6.069     | 0.021    | 1.000                    |
|                  | Trehalose 20 E9 | 1.880                      | 6.069     | 0.310    | 1.000                    |
| Sucrose 20 E9    | Trehalose 20 E9 | 1.750                      | 6.069     | 0.288    | 1.000                    |

*Note.* P-value adjusted for comparing a family of 12

*Note.* Results are averaged over the levels of: Annealing

**Table S7.** Tukey post-hoc tests: effects and interactions of the factors on cake appearance of freeze-dried R2LC

## Post Hoc Tests-Cake appearance

### Standard

#### Post Hoc Comparisons - Lyoprotectant

|         |           | Mean Difference | SE    | t     | p <sub>Tukey</sub> |
|---------|-----------|-----------------|-------|-------|--------------------|
| Sucrose | Trehalose | 0.050           | 0.169 | 0.295 | 0.768              |

*Note.* Results are averaged over the levels of: Annealing, Lyoprotectant concentration, Bacterial concentration

#### Post Hoc Comparisons - Annealing

|    |     | Mean Difference | SE    | t      | p <sub>Tukey</sub> |
|----|-----|-----------------|-------|--------|--------------------|
| No | Yes | -0.050          | 0.169 | -0.295 | 0.768              |

*Note.* Results are averaged over the levels of: Lyoprotectant, Lyoprotectant concentration, Bacterial concentration

#### Post Hoc Comparisons - Lyoprotectant concentration

|    |    | Mean Difference | SE    | t      | p <sub>Tukey</sub> |
|----|----|-----------------|-------|--------|--------------------|
| 10 | 15 | 0.125           | 0.207 | 0.602  | 0.819              |
|    | 20 | -0.975          | 0.207 | -4.699 | < .001 ***         |
| 15 | 20 | -1.100          | 0.207 | -5.301 | < .001 ***         |

\*\*\* p < .001

*Note.* P-value adjusted for comparing a family of 3

*Note.* Results are averaged over the levels of: Lyoprotectant, Annealing, Bacterial concentration

#### Post Hoc Comparisons - Bacterial concentration

|     |    | Mean Difference | SE    | t      | p <sub>Tukey</sub> |
|-----|----|-----------------|-------|--------|--------------------|
| E10 | E9 | -0.350          | 0.169 | -2.066 | 0.041 *            |

\* p < .05

*Note.* Results are averaged over the levels of: Lyoprotectant, Annealing, Lyoprotectant concentration

#### Post Hoc Comparisons - Lyoprotectant \* Annealing

|              |               | Mean Difference          | SE    | t                        | p <sub>Tukey</sub> |
|--------------|---------------|--------------------------|-------|--------------------------|--------------------|
| Sucrose No   | Trehalose No  | 0.367                    | 0.240 | 1.530                    | 0.423              |
|              | Sucrose Yes   | 0.267                    | 0.240 | 1.113                    | 0.682              |
|              | Trehalose Yes | -1.228×10 <sup>-15</sup> | 0.240 | -5.126×10 <sup>-15</sup> | 1.000              |
| Trehalose No | Sucrose Yes   | -0.100                   | 0.240 | -0.417                   | 0.975              |
|              | Trehalose Yes | -0.367                   | 0.240 | -1.530                   | 0.423              |

### Post Hoc Comparisons - Lyoprotectant \* Annealing

|             |               | Mean Difference | SE    | t      | P <sub>tukey</sub> |
|-------------|---------------|-----------------|-------|--------|--------------------|
| Sucrose Yes | Trehalose Yes | -0.267          | 0.240 | -1.113 | 0.682              |

*Note.* P-value adjusted for comparing a family of 4

*Note.* Results are averaged over the levels of: Lyoprotectant concentration, Bacterial concentration

### Post Hoc Comparisons - Lyoprotectant \* Lyoprotectant concentration

|              |              | Mean Difference | SE    | t      | P <sub>tukey</sub> |
|--------------|--------------|-----------------|-------|--------|--------------------|
| Sucrose 10   | Trehalose 10 | -0.250          | 0.293 | -0.852 | 0.957              |
|              | Sucrose 15   | 0.150           | 0.293 | 0.511  | 0.996              |
|              | Trehalose 15 | -0.150          | 0.293 | -0.511 | 0.996              |
|              | Sucrose 20   | -1.450          | 0.293 | -4.941 | < .001 ***         |
|              | Trehalose 20 | -0.750          | 0.293 | -2.556 | 0.118              |
| Trehalose 10 | Sucrose 15   | 0.400           | 0.293 | 1.363  | 0.749              |
|              | Trehalose 15 | 0.100           | 0.293 | 0.341  | 0.999              |
|              | Sucrose 20   | -1.200          | 0.293 | -4.090 | 0.001 **           |
|              | Trehalose 20 | -0.500          | 0.293 | -1.704 | 0.532              |
| Sucrose 15   | Trehalose 15 | -0.300          | 0.293 | -1.022 | 0.909              |
|              | Sucrose 20   | -1.600          | 0.293 | -5.453 | < .001 ***         |
|              | Trehalose 20 | -0.900          | 0.293 | -3.067 | 0.032 *            |
| Trehalose 15 | Sucrose 20   | -1.300          | 0.293 | -4.430 | < .001 ***         |
|              | Trehalose 20 | -0.600          | 0.293 | -2.045 | 0.325              |
| Sucrose 20   | Trehalose 20 | 0.700           | 0.293 | 2.386  | 0.171              |

*Note.* Results are averaged over the levels of: Annealing, Bacterial concentration

*Note.* P-value adjusted for comparing a family of 6

\* p < .05, \*\* p < .01, \*\*\* p < .001

### Post Hoc Comparisons - Lyoprotectant \* Bacterial concentration

|               |               | Mean Difference | SE    | t      | P <sub>tukey</sub> |
|---------------|---------------|-----------------|-------|--------|--------------------|
| Sucrose E10   | Trehalose E10 | 0.333           | 0.240 | 1.391  | 0.508              |
|               | Sucrose E9    | -0.067          | 0.240 | -0.278 | 0.992              |
|               | Trehalose E9  | -0.300          | 0.240 | -1.252 | 0.595              |
| Trehalose E10 | Sucrose E9    | -0.400          | 0.240 | -1.670 | 0.345              |
|               | Trehalose E9  | -0.633          | 0.240 | -2.643 | 0.046 *            |
| Sucrose E9    | Trehalose E9  | -0.233          | 0.240 | -0.974 | 0.765              |

\* p < .05

*Note.* P-value adjusted for comparing a family of 4

*Note.* Results are averaged over the levels of: Annealing, Lyoprotectant concentration

### Post Hoc Comparisons - Annealing \* Lyoprotectant concentration

|       |        | Mean Difference | SE    | t     | P <sub>tukey</sub> |
|-------|--------|-----------------|-------|-------|--------------------|
| No 10 | Yes 10 | 0.150           | 0.293 | 0.511 | 0.996              |

### Post Hoc Comparisons - Annealing \* Lyoprotectant concentration

|        |        | Mean Difference | SE    | t      | P <sub>tukey</sub> |
|--------|--------|-----------------|-------|--------|--------------------|
| Yes 10 | No 15  | 0.100           | 0.293 | 0.341  | 0.999              |
|        | Yes 15 | 0.300           | 0.293 | 1.022  | 0.909              |
|        | No 20  | -0.650          | 0.293 | -2.215 | 0.240              |
|        | Yes 20 | -1.150          | 0.293 | -3.919 | 0.002 **           |
|        | No 15  | -0.050          | 0.293 | -0.170 | 1.000              |
|        | Yes 15 | 0.150           | 0.293 | 0.511  | 0.996              |
|        | No 20  | -0.800          | 0.293 | -2.726 | 0.079              |
|        | Yes 20 | -1.300          | 0.293 | -4.430 | < .001 ***         |
| No 15  | Yes 15 | 0.200           | 0.293 | 0.682  | 0.984              |
|        | No 20  | -0.750          | 0.293 | -2.556 | 0.118              |
|        | Yes 20 | -1.250          | 0.293 | -4.260 | < .001 ***         |
| Yes 15 | No 20  | -0.950          | 0.293 | -3.238 | 0.020 *            |
|        | Yes 20 | -1.450          | 0.293 | -4.941 | < .001 ***         |
| No 20  | Yes 20 | -0.500          | 0.293 | -1.704 | 0.532              |

*Note.* Results are averaged over the levels of: Lyoprotectant, Bacterial concentration

*Note.* P-value adjusted for comparing a family of 6

\* p < .05, \*\* p < .01, \*\*\* p < .001

### Post Hoc Comparisons - Annealing \* Bacterial concentration

|         |         | Mean Difference         | SE    | t                       | P <sub>tukey</sub> |
|---------|---------|-------------------------|-------|-------------------------|--------------------|
| No E10  | Yes E10 | 6.939×10 <sup>-18</sup> | 0.240 | 2.896×10 <sup>-17</sup> | 1.000              |
|         | No E9   | -0.300                  | 0.240 | -1.252                  | 0.595              |
|         | Yes E9  | -0.400                  | 0.240 | -1.670                  | 0.345              |
| Yes E10 | No E9   | -0.300                  | 0.240 | -1.252                  | 0.595              |
|         | Yes E9  | -0.400                  | 0.240 | -1.670                  | 0.345              |
| No E9   | Yes E9  | -0.100                  | 0.240 | -0.417                  | 0.975              |

*Note.* P-value adjusted for comparing a family of 4

*Note.* Results are averaged over the levels of: Lyoprotectant, Lyoprotectant concentration

### Post Hoc Comparisons - Lyoprotectant concentration \* Bacterial concentration

|        |        | Mean Difference | SE    | t      | P <sub>tukey</sub> |
|--------|--------|-----------------|-------|--------|--------------------|
| 10 E10 | 15 E10 | 0.200           | 0.293 | 0.682  | 0.984              |
|        | 20 E10 | -1.050          | 0.293 | -3.578 | 0.007 **           |
|        | 10 E9  | -0.350          | 0.293 | -1.193 | 0.839              |
|        | 15 E9  | -0.300          | 0.293 | -1.022 | 0.909              |
|        | 20 E9  | -1.250          | 0.293 | -4.260 | < .001 ***         |
| 15 E10 | 20 E10 | -1.250          | 0.293 | -4.260 | < .001 ***         |
|        | 10 E9  | -0.550          | 0.293 | -1.874 | 0.424              |
|        | 15 E9  | -0.500          | 0.293 | -1.704 | 0.532              |
|        | 20 E9  | -1.450          | 0.293 | -4.941 | < .001 ***         |
| 20 E10 | 10 E9  | 0.700           | 0.293 | 2.386  | 0.171              |
|        | 15 E9  | 0.750           | 0.293 | 2.556  | 0.118              |

**Post Hoc Comparisons - Lyoprotectant concentration \* Bacterial concentration**

|       |       | <b>Mean Difference</b> | <b>SE</b> | <b>t</b> | <b>P<sub>Tukey</sub></b> |
|-------|-------|------------------------|-----------|----------|--------------------------|
|       | 20 E9 | -0.200                 | 0.293     | -0.682   | 0.984                    |
| 10 E9 | 15 E9 | 0.050                  | 0.293     | 0.170    | 1.000                    |
|       | 20 E9 | -0.900                 | 0.293     | -3.067   | 0.032 *                  |
| 15 E9 | 20 E9 | -0.950                 | 0.293     | -3.238   | 0.020 *                  |

*Note.* Results are averaged over the levels of: Lyoprotectant, Annealing

*Note.* P-value adjusted for comparing a family of 6

\*  $p < .05$ , \*\*  $p < .01$ , \*\*\*  $p < .001$

**Table S8.** Accelerated stability- Tukey post-hoc tests: effects and interactions of the factors on water content of freeze-dried R2LC

## Post Hoc Tests- Accelerated storage-water content

### Standard

#### Post Hoc Comparisons - Lyoprotectant

|         |           | Mean Difference | SE    | t     | Cohen's d | p <sub>tukey</sub> |
|---------|-----------|-----------------|-------|-------|-----------|--------------------|
| Sucrose | Trehalose | 0.198           | 0.141 | 1.404 | 0.234     | 0.163              |

*Note.* Results are averaged over the levels of: Annealing, Lyoprotectant concentration (%), Bacterial Concentration

#### Post Hoc Comparisons - Annealing

|    |     | Mean Difference | SE    | t     | Cohen's d | p <sub>tukey</sub> |
|----|-----|-----------------|-------|-------|-----------|--------------------|
| No | Yes | 0.010           | 0.141 | 0.072 | 0.012     | 0.943              |

*Note.* Results are averaged over the levels of: Lyoprotectant, Lyoprotectant concentration (%), Bacterial Concentration

#### Post Hoc Comparisons - Lyoprotectant concentration (%)

|    |    | Mean Difference | SE    | t      | Cohen's d | p <sub>tukey</sub> |
|----|----|-----------------|-------|--------|-----------|--------------------|
| 10 | 15 | -0.063          | 0.173 | -0.364 | -0.074    | 0.929              |
|    | 20 | -1.341          | 0.173 | -7.743 | -1.581    | < .001 ***         |
| 15 | 20 | -1.278          | 0.173 | -7.379 | -1.506    | < .001 ***         |

\*\*\* p < .001

*Note.* P-value adjusted for comparing a family of 3

*Note.* Results are averaged over the levels of: Lyoprotectant, Annealing, Bacterial Concentration

#### Post Hoc Comparisons - Bacterial Concentration

|     |    | Mean Difference | SE    | t      | Cohen's d | p <sub>tukey</sub> |
|-----|----|-----------------|-------|--------|-----------|--------------------|
| e10 | e9 | -1.125          | 0.141 | -7.955 | -1.326    | < .001 ***         |

\*\*\* p < .001

*Note.* Results are averaged over the levels of: Lyoprotectant, Annealing, Lyoprotectant concentration (%)

#### Post Hoc Comparisons - Lyoprotectant \* Annealing

|              |               | Mean Difference | SE    | t      | Cohen's d | p <sub>tukey</sub> |
|--------------|---------------|-----------------|-------|--------|-----------|--------------------|
| Sucrose No   | Trehalose No  | -0.355          | 0.200 | -1.777 | -0.419    | 0.289              |
|              | Sucrose Yes   | -0.544          | 0.200 | -2.718 | -0.641    | 0.037 *            |
|              | Trehalose Yes | 0.209           | 0.200 | 1.043  | 0.246     | 0.724              |
| Trehalose No | Sucrose Yes   | -0.188          | 0.200 | -0.942 | -0.222    | 0.782              |
|              | Trehalose Yes | 0.564           | 0.200 | 2.820  | 0.665     | 0.028 *            |



### Post Hoc Comparisons - Lyoprotectant \* Annealing

|             |               | Mean Difference | SE    | t     | Cohen's d | p <sub>tukey</sub> |
|-------------|---------------|-----------------|-------|-------|-----------|--------------------|
| Sucrose Yes | Trehalose Yes | 0.752           | 0.200 | 3.761 | 0.887     | 0.001 **           |

\* p < .05, \*\* p < .01

*Note.* P-value adjusted for comparing a family of 4

*Note.* Results are averaged over the levels of: Lyoprotectant concentration (%), Bacterial Concentration

### Post Hoc Comparisons - Lyoprotectant \* Lyoprotectant concentration (%)

|              |              | Mean Difference | SE    | t      | Cohen's d | p <sub>tukey</sub> |
|--------------|--------------|-----------------|-------|--------|-----------|--------------------|
| Sucrose 10   | Trehalose 10 | -0.209          | 0.245 | -0.852 | -0.246    | 0.957              |
|              | Sucrose 15   | -0.318          | 0.245 | -1.296 | -0.374    | 0.787              |
|              | Trehalose 15 | -0.018          | 0.245 | -0.071 | -0.021    | 1.000              |
|              | Sucrose 20   | -1.698          | 0.245 | -6.931 | -2.001    | < .001 ***         |
|              | Trehalose 20 | -1.193          | 0.245 | -4.872 | -1.406    | < .001 ***         |
| Trehalose 10 | Sucrose 15   | -0.109          | 0.245 | -0.444 | -0.128    | 0.998              |
|              | Trehalose 15 | 0.191           | 0.245 | 0.781  | 0.225     | 0.970              |
|              | Sucrose 20   | -1.489          | 0.245 | -6.078 | -1.755    | < .001 ***         |
|              | Trehalose 20 | -0.985          | 0.245 | -4.020 | -1.160    | 0.001 **           |
| Sucrose 15   | Trehalose 15 | 0.300           | 0.245 | 1.225  | 0.354     | 0.824              |
|              | Sucrose 20   | -1.380          | 0.245 | -5.634 | -1.626    | < .001 ***         |
|              | Trehalose 20 | -0.876          | 0.245 | -3.576 | -1.032    | 0.006 **           |
| Trehalose 15 | Sucrose 20   | -1.680          | 0.245 | -6.859 | -1.980    | < .001 ***         |
|              | Trehalose 20 | -1.176          | 0.245 | -4.801 | -1.386    | < .001 ***         |
| Sucrose 20   | Trehalose 20 | 0.504           | 0.245 | 2.058  | 0.594     | 0.316              |

\* p < .05, \*\* p < .01, \*\*\* p < .001

*Note.* P-value adjusted for comparing a family of 6

*Note.* Results are averaged over the levels of: Annealing, Bacterial Concentration

### Post Hoc Comparisons - Annealing \* Lyoprotectant concentration (%)

|        |        | Mean Difference | SE    | t      | Cohen's d | p <sub>tukey</sub> |
|--------|--------|-----------------|-------|--------|-----------|--------------------|
| No 10  | Yes 10 | -0.189          | 0.245 | -0.771 | -0.222    | 0.972              |
|        | No 15  | -0.204          | 0.245 | -0.832 | -0.240    | 0.961              |
|        | Yes 15 | -0.111          | 0.245 | -0.454 | -0.131    | 0.998              |
|        | No 20  | -1.499          | 0.245 | -6.119 | -1.766    | < .001 ***         |
|        | Yes 20 | -1.372          | 0.245 | -5.602 | -1.617    | < .001 ***         |
| Yes 10 | No 15  | -0.015          | 0.245 | -0.061 | -0.018    | 1.000              |
|        | Yes 15 | 0.077           | 0.245 | 0.316  | 0.091     | 1.000              |
|        | No 20  | -1.310          | 0.245 | -5.349 | -1.544    | < .001 ***         |
|        | Yes 20 | -1.183          | 0.245 | -4.831 | -1.395    | < .001 ***         |
| No 15  | Yes 15 | 0.093           | 0.245 | 0.378  | 0.109     | 0.999              |
|        | No 20  | -1.295          | 0.245 | -5.287 | -1.526    | < .001 ***         |
|        | Yes 20 | -1.168          | 0.245 | -4.770 | -1.377    | < .001 ***         |
| Yes 15 | No 20  | -1.388          | 0.245 | -5.665 | -1.635    | < .001 ***         |

### Post Hoc Comparisons - Annealing \* Lyoprotectant concentration (%)

|       |        | Mean Difference | SE    | t      | Cohen's d | p <sub>Tukey</sub> |
|-------|--------|-----------------|-------|--------|-----------|--------------------|
|       | Yes 20 | -1.261          | 0.245 | -5.148 | -1.486    | < .001 ***         |
| No 20 | Yes 20 | 0.127           | 0.245 | 0.517  | 0.149     | 0.995              |

\*\*\* p < .001

Note. P-value adjusted for comparing a family of 6

Note. Results are averaged over the levels of: Lyoprotectant, Bacterial Concentration

### Post Hoc Comparisons - Lyoprotectant \* Bacterial Concentration

|               |               | Mean Difference | SE    | t      | Cohen's d | p <sub>Tukey</sub> |
|---------------|---------------|-----------------|-------|--------|-----------|--------------------|
| Sucrose e10   | Trehalose e10 | 0.112           | 0.200 | 0.560  | 0.132     | 0.944              |
|               | Sucrose e9    | -1.211          | 0.200 | -6.057 | -1.428    | < .001 ***         |
|               | Trehalose e9  | -0.926          | 0.200 | -4.632 | -1.092    | < .001 ***         |
| Trehalose e10 | Sucrose e9    | -1.323          | 0.200 | -6.617 | -1.560    | < .001 ***         |
|               | Trehalose e9  | -1.038          | 0.200 | -5.192 | -1.224    | < .001 ***         |
| Sucrose e9    | Trehalose e9  | 0.285           | 0.200 | 1.425  | 0.336     | 0.486              |

\*\*\* p < .001

Note. P-value adjusted for comparing a family of 4

Note. Results are averaged over the levels of: Annealing, Lyoprotectant concentration (%)

### Post Hoc Comparisons - Annealing \* Bacterial Concentration

|         |         | Mean Difference | SE    | t      | Cohen's d | p <sub>Tukey</sub> |
|---------|---------|-----------------|-------|--------|-----------|--------------------|
| No e10  | Yes e10 | -0.252          | 0.200 | -1.263 | -0.298    | 0.588              |
|         | No e9   | -1.387          | 0.200 | -6.938 | -1.635    | < .001 ***         |
|         | Yes e9  | -1.115          | 0.200 | -5.574 | -1.314    | < .001 ***         |
| Yes e10 | No e9   | -1.135          | 0.200 | -5.676 | -1.338    | < .001 ***         |
|         | Yes e9  | -0.862          | 0.200 | -4.312 | -1.016    | < .001 ***         |
| No e9   | Yes e9  | 0.273           | 0.200 | 1.364  | 0.322     | 0.524              |

\*\*\* p < .001

Note. P-value adjusted for comparing a family of 4

Note. Results are averaged over the levels of: Lyoprotectant, Lyoprotectant concentration (%)

### Post Hoc Comparisons - Lyoprotectant concentration (%) \* Bacterial Concentration

|        |        | Mean Difference | SE    | t       | Cohen's d | p <sub>Tukey</sub> |
|--------|--------|-----------------|-------|---------|-----------|--------------------|
| 10 e10 | 15 e10 | 0.108           | 0.245 | 0.442   | 0.128     | 0.998              |
|        | 20 e10 | -0.603          | 0.245 | -2.463  | -0.711    | 0.143              |
|        | 10 e9  | -0.519          | 0.245 | -2.118  | -0.611    | 0.285              |
|        | 15 e9  | -0.753          | 0.245 | -3.076  | -0.888    | 0.030 *            |
|        | 20 e9  | -2.598          | 0.245 | -10.605 | -3.061    | < .001 ***         |
| 15 e10 | 20 e10 | -0.712          | 0.245 | -2.906  | -0.839    | 0.048 *            |
|        | 10 e9  | -0.627          | 0.245 | -2.560  | -0.739    | 0.115              |
|        | 15 e9  | -0.862          | 0.245 | -3.518  | -1.016    | 0.008 **           |

**Post Hoc Comparisons - Lyoprotectant concentration (%) \* Bacterial Concentration**

|        |       | <b>Mean<br/>Difference</b> | <b>SE</b> | <b>t</b> | <b>Cohen's d</b> | <b>p<sub>Tukey</sub></b> |
|--------|-------|----------------------------|-----------|----------|------------------|--------------------------|
|        | 20 e9 | -2.706                     | 0.245     | -11.048  | -3.189           | < .001 ***               |
| 20 e10 | 10 e9 | 0.085                      | 0.245     | 0.345    | 0.100            | 0.999                    |
|        | 15 e9 | -0.150                     | 0.245     | -0.612   | -0.177           | 0.990                    |
|        | 20 e9 | -1.994                     | 0.245     | -8.142   | -2.350           | < .001 ***               |
| 10 e9  | 15 e9 | -0.235                     | 0.245     | -0.958   | -0.276           | 0.930                    |
|        | 20 e9 | -2.079                     | 0.245     | -8.487   | -2.450           | < .001 ***               |
| 15 e9  | 20 e9 | -1.844                     | 0.245     | -7.529   | -2.174           | < .001 ***               |

*Note.* Results are averaged over the levels of: Lyoprotectant, Annealing

*Note.* P-value adjusted for comparing a family of 6

\* p < .05, \*\* p < .01, \*\*\* p < .001

**Table S9.** Post-hoc test to evaluate the effect of all variables on freeze-drying survival of freeze-dried R2LC.

## Post Hoc Tests- Freeze-dried Survival

### Standard

#### Post Hoc Comparisons - Lyoprotectant

|         |           | Mean Difference | SE    | t     | p <sub>Tukey</sub> |
|---------|-----------|-----------------|-------|-------|--------------------|
| Sucrose | Trehalose | 25.420          | 3.628 | 7.007 | < .001             |

*Note.* Results are averaged over the levels of: Annealing, Lyoprotectant concentration, Bacterial concentration

#### Post Hoc Comparisons - Annealing

|    |     | Mean Difference | SE    | t     | p <sub>Tukey</sub> |
|----|-----|-----------------|-------|-------|--------------------|
| No | Yes | 13.073          | 3.628 | 3.604 | < .001             |

*Note.* Results are averaged over the levels of: Lyoprotectant, Lyoprotectant concentration, Bacterial concentration

#### Post Hoc Comparisons - Lyoprotectant concentration

|    |    | Mean Difference | SE    | t      | p <sub>Tukey</sub> |
|----|----|-----------------|-------|--------|--------------------|
| 10 | 15 | -11.131         | 4.443 | -2.505 | 0.044              |
|    | 20 | -9.136          | 4.443 | -2.056 | 0.114              |
| 15 | 20 | 1.995           | 4.443 | 0.449  | 0.895              |

*Note.* P-value adjusted for comparing a family of 3

*Note.* Results are averaged over the levels of: Lyoprotectant, Annealing, Bacterial concentration

#### Post Hoc Comparisons - Bacterial concentration

|     |    | Mean Difference | SE    | t     | p <sub>Tukey</sub> |
|-----|----|-----------------|-------|-------|--------------------|
| E10 | E9 | 0.041           | 3.628 | 0.011 | 0.991              |

*Note.* Results are averaged over the levels of: Lyoprotectant, Annealing, Lyoprotectant concentration

#### Post Hoc Comparisons - Lyoprotectant \* Annealing

|              |               | Mean Difference | SE    | t      | p <sub>Tukey</sub> |
|--------------|---------------|-----------------|-------|--------|--------------------|
| Sucrose No   | Trehalose No  | 8.298           | 5.131 | 1.617  | 0.382              |
|              | Sucrose Yes   | -4.049          | 5.131 | -0.789 | 0.859              |
|              | Trehalose Yes | 38.494          | 5.131 | 7.503  | < .001             |
| Trehalose No | Sucrose Yes   | -12.347         | 5.131 | -2.407 | 0.094              |
|              | Trehalose Yes | 30.195          | 5.131 | 5.885  | < .001             |

### Post Hoc Comparisons - Lyoprotectant \* Annealing

|             |               | Mean Difference | SE    | t     | P <sub>tukey</sub> |
|-------------|---------------|-----------------|-------|-------|--------------------|
| Sucrose Yes | Trehalose Yes | 42.542          | 5.131 | 8.292 | < .001             |

*Note.* P-value adjusted for comparing a family of 4

*Note.* Results are averaged over the levels of: Lyoprotectant concentration, Bacterial concentration

### Post Hoc Comparisons - Lyoprotectant \* Lyoprotectant concentration

|              |              | Mean Difference | SE    | t      | P <sub>tukey</sub> |
|--------------|--------------|-----------------|-------|--------|--------------------|
| Sucrose 10   | Trehalose 10 | 28.312          | 6.284 | 4.506  | < .001             |
|              | Sucrose 15   | -16.143         | 6.284 | -2.569 | 0.132              |
|              | Trehalose 15 | 22.193          | 6.284 | 3.532  | 0.014              |
|              | Sucrose 20   | 0.214           | 6.284 | 0.034  | 1.000              |
|              | Trehalose 20 | 9.827           | 6.284 | 1.564  | 0.627              |
| Trehalose 10 | Sucrose 15   | -44.455         | 6.284 | -7.075 | < .001             |
|              | Trehalose 15 | -6.119          | 6.284 | -0.974 | 0.923              |
|              | Sucrose 20   | -28.098         | 6.284 | -4.472 | 0.001              |
|              | Trehalose 20 | -18.486         | 6.284 | -2.942 | 0.059              |
| Sucrose 15   | Trehalose 15 | 38.336          | 6.284 | 6.101  | < .001             |
|              | Sucrose 20   | 16.357          | 6.284 | 2.603  | 0.123              |
|              | Trehalose 20 | 25.970          | 6.284 | 4.133  | 0.003              |
| Trehalose 15 | Sucrose 20   | -21.979         | 6.284 | -3.498 | 0.015              |
|              | Trehalose 20 | -12.367         | 6.284 | -1.968 | 0.380              |
| Sucrose 20   | Trehalose 20 | 9.613           | 6.284 | 1.530  | 0.648              |

*Note.* P-value adjusted for comparing a family of 6

*Note.* Results are averaged over the levels of: Annealing, Bacterial concentration

### Post Hoc Comparisons - Lyoprotectant \* Bacterial concentration

|               |               | Mean Difference | SE    | t      | P <sub>tukey</sub> |
|---------------|---------------|-----------------|-------|--------|--------------------|
| Sucrose E10   | Trehalose E10 | 18.943          | 5.131 | 3.692  | 0.004              |
|               | Sucrose E9    | -6.437          | 5.131 | -1.255 | 0.597              |
|               | Trehalose E9  | 25.462          | 5.131 | 4.963  | < .001             |
| Trehalose E10 | Sucrose E9    | -25.379         | 5.131 | -4.947 | < .001             |
|               | Trehalose E9  | 6.519           | 5.131 | 1.271  | 0.587              |
| Sucrose E9    | Trehalose E9  | 31.898          | 5.131 | 6.217  | < .001             |

*Note.* P-value adjusted for comparing a family of 4

*Note.* Results are averaged over the levels of: Annealing, Lyoprotectant concentration

**Table S10.** Post-hoc test to evaluate the effect of all variables on freeze-drying metabolic activity of freeze-dried R2LC

## Post Hoc Tests- Metabolic activity

### Standard

#### Post Hoc Comparisons - Lyoprotectant

|         |           | Mean Difference | SE    | t      | ptukey |
|---------|-----------|-----------------|-------|--------|--------|
| Sucrose | Trehalose | 0.483           | 0.011 | 43.608 | < .001 |

*Note.* Results are averaged over the levels of: Annealing, Lyoprotectant concentration, Bacterial concentration

#### Post Hoc Comparisons - Annealing

|    |     | Mean Difference | SE    | t       | ptukey |
|----|-----|-----------------|-------|---------|--------|
| No | Yes | -0.130          | 0.011 | -11.729 | < .001 |

*Note.* Results are averaged over the levels of: Lyoprotectant, Lyoprotectant concentration, Bacterial concentration

#### Post Hoc Comparisons - Lyoprotectant concentration

|    |    | Mean Difference | SE    | t      | ptukey |
|----|----|-----------------|-------|--------|--------|
| 10 | 15 | -0.028          | 0.014 | -2.072 | 0.110  |
|    | 20 | -0.015          | 0.014 | -1.105 | 0.517  |
| 15 | 20 | 0.013           | 0.014 | 0.967  | 0.602  |

*Note.* P-value adjusted for comparing a family of 3

*Note.* Results are averaged over the levels of: Lyoprotectant, Annealing, Bacterial concentration

#### Post Hoc Comparisons - Bacterial concentration

|     |    | Mean Difference | SE    | t      | ptukey |
|-----|----|-----------------|-------|--------|--------|
| E10 | E9 | 0.386           | 0.011 | 34.811 | < .001 |

*Note.* Results are averaged over the levels of: Lyoprotectant, Annealing, Lyoprotectant concentration

#### Post Hoc Comparisons - Lyoprotectant \* Annealing

|              |               | Mean Difference | SE    | t       | ptukey |
|--------------|---------------|-----------------|-------|---------|--------|
| Sucrose No   | Trehalose No  | 0.356           | 0.016 | 22.701  | < .001 |
|              | Sucrose Yes   | -0.258          | 0.016 | -16.428 | < .001 |
|              | Trehalose Yes | 0.353           | 0.016 | 22.542  | < .001 |
| Trehalose No | Sucrose Yes   | -0.613          | 0.016 | -39.129 | < .001 |

### Post Hoc Comparisons - Lyoprotectant \* Annealing

|             |               | Mean Difference | SE    | t      | P <sub>Tukey</sub> |
|-------------|---------------|-----------------|-------|--------|--------------------|
| Sucrose Yes | Trehalose Yes | -0.003          | 0.016 | -0.159 | 0.999              |
|             | Trehalose Yes | 0.611           | 0.016 | 38.970 | < .001             |

*Note.* P-value adjusted for comparing a family of 4

*Note.* Results are averaged over the levels of: Lyoprotectant concentration, Bacterial concentration

### Post Hoc Comparisons - Lyoprotectant \* Lyoprotectant concentration

|              |              | Mean Difference | SE    | t       | P <sub>Tukey</sub> |
|--------------|--------------|-----------------|-------|---------|--------------------|
| Sucrose 10   | Trehalose 10 | 0.474           | 0.019 | 24.678  | < .001             |
|              | Sucrose 15   | -0.041          | 0.019 | -2.149  | 0.287              |
|              | Trehalose 15 | 0.459           | 0.019 | 23.896  | < .001             |
|              | Sucrose 20   | -0.016          | 0.019 | -0.846  | 0.956              |
| Trehalose 10 | Trehalose 20 | 0.460           | 0.019 | 23.962  | < .001             |
|              | Sucrose 15   | -0.515          | 0.019 | -26.826 | < .001             |
|              | Trehalose 15 | -0.015          | 0.019 | -0.781  | 0.969              |
|              | Sucrose 20   | -0.490          | 0.019 | -25.524 | < .001             |
| Sucrose 15   | Trehalose 20 | -0.014          | 0.019 | -0.716  | 0.979              |
|              | Trehalose 15 | 0.500           | 0.019 | 26.045  | < .001             |
|              | Sucrose 20   | 0.025           | 0.019 | 1.302   | 0.782              |
|              | Trehalose 20 | 0.501           | 0.019 | 26.110  | < .001             |
| Trehalose 15 | Sucrose 20   | -0.475          | 0.019 | -24.743 | < .001             |
|              | Trehalose 20 | 0.001           | 0.019 | 0.065   | 1.000              |
| Sucrose 20   | Trehalose 20 | 0.476           | 0.019 | 24.808  | < .001             |

*Note.* P-value adjusted for comparing a family of 6

*Note.* Results are averaged over the levels of: Annealing, Bacterial concentration

### Post Hoc Comparisons - Lyoprotectant \* Bacterial concentration

|               |               | Mean Difference | SE    | t      | P <sub>Tukey</sub> |
|---------------|---------------|-----------------|-------|--------|--------------------|
| Sucrose E10   | Trehalose E10 | 0.487           | 0.016 | 31.048 | < .001             |
|               | Sucrose E9    | 0.389           | 0.016 | 24.828 | < .001             |
|               | Trehalose E9  | 0.869           | 0.016 | 55.450 | < .001             |
| Trehalose E10 | Sucrose E9    | -0.098          | 0.016 | -6.220 | < .001             |
|               | Trehalose E9  | 0.383           | 0.016 | 24.402 | < .001             |
| Sucrose E9    | Trehalose E9  | 0.480           | 0.016 | 30.623 | < .001             |

*Note.* P-value adjusted for comparing a family of 4

*Note.* Results are averaged over the levels of: Annealing, Lyoprotectant concentration

**Table S11.** Post-hoc test to evaluate the effect of accelerated storage stability (week 2) on survival. \*p<0.05, \*\*p<0.01, and \*\*\*p<0.001

## Post Hoc Tests- Accelerated stability survival 2

### Standard

#### Post Hoc Comparisons - Lyoprotectant

|         |           | Mean Difference | SE    | t     | p <sub>tukey</sub> |
|---------|-----------|-----------------|-------|-------|--------------------|
| Sucrose | Trehalose | 15.106          | 3.424 | 4.412 | < .001             |

*Note.* Results are averaged over the levels of: Annealing, Lyoprotectant concentration, Bacterial concentration

#### Post Hoc Comparisons - Annealing

|    |     | Mean Difference | SE    | t      | p <sub>tukey</sub> |
|----|-----|-----------------|-------|--------|--------------------|
| No | Yes | -6.080          | 3.424 | -1.776 | 0.084              |

*Note.* Results are averaged over the levels of: Lyoprotectant, Lyoprotectant concentration, Bacterial concentration

#### Post Hoc Comparisons - Lyoprotectant concentration

|    |    | Mean Difference | SE    | t      | p <sub>tukey</sub> |
|----|----|-----------------|-------|--------|--------------------|
| 10 | 15 | -8.720          | 4.193 | -2.080 | 0.109              |
|    | 20 | -2.298          | 4.193 | -0.548 | 0.848              |
| 15 | 20 | 6.422           | 4.193 | 1.532  | 0.289              |

*Note.* P-value adjusted for comparing a family of 3

*Note.* Results are averaged over the levels of: Lyoprotectant, Annealing, Bacterial concentration

#### Post Hoc Comparisons - Bacterial concentration

|     |    | Mean Difference | SE    | t     | p <sub>tukey</sub> |
|-----|----|-----------------|-------|-------|--------------------|
| E10 | E9 | 7.989           | 3.424 | 2.333 | 0.025              |

*Note.* Results are averaged over the levels of: Lyoprotectant, Annealing, Lyoprotectant concentration

#### Post Hoc Comparisons - Lyoprotectant \* Annealing

|              |               | Mean Difference | SE    | t      | p <sub>tukey</sub> |
|--------------|---------------|-----------------|-------|--------|--------------------|
| Sucrose No   | Trehalose No  | 5.468           | 4.842 | 1.129  | 0.674              |
|              | Sucrose Yes   | -15.718         | 4.842 | -3.247 | 0.013              |
|              | Trehalose Yes | 9.026           | 4.842 | 1.864  | 0.262              |
| Trehalose No | Sucrose Yes   | -21.187         | 4.842 | -4.376 | < .001             |



### Post Hoc Comparisons - Lyoprotectant \* Annealing

|             |               | Mean Difference | SE    | t     | P <sub>tukey</sub> |
|-------------|---------------|-----------------|-------|-------|--------------------|
|             | Trehalose Yes | 3.557           | 4.842 | 0.735 | 0.882              |
| Sucrose Yes | Trehalose Yes | 24.744          | 4.842 | 5.111 | < .001             |

*Note.* P-value adjusted for comparing a family of 4

*Note.* Results are averaged over the levels of: Lyoprotectant concentration, Bacterial concentration

### Post Hoc Comparisons - Lyoprotectant \* Lyoprotectant concentration

|              |              | Mean Difference | SE    | t      | P <sub>tukey</sub> |
|--------------|--------------|-----------------|-------|--------|--------------------|
| Sucrose 10   | Trehalose 10 | 18.390          | 5.930 | 3.101  | 0.041              |
|              | Sucrose 15   | -11.708         | 5.930 | -1.974 | 0.377              |
|              | Trehalose 15 | 12.657          | 5.930 | 2.135  | 0.294              |
|              | Sucrose 20   | 5.615           | 5.930 | 0.947  | 0.931              |
|              | Trehalose 20 | 8.179           | 5.930 | 1.379  | 0.739              |
| Trehalose 10 | Sucrose 15   | -30.098         | 5.930 | -5.076 | < .001             |
|              | Trehalose 15 | -5.732          | 5.930 | -0.967 | 0.925              |
|              | Sucrose 20   | -12.775         | 5.930 | -2.154 | 0.284              |
|              | Trehalose 20 | -10.211         | 5.930 | -1.722 | 0.527              |
| Sucrose 15   | Trehalose 15 | 24.365          | 5.930 | 4.109  | 0.003              |
|              | Sucrose 20   | 17.323          | 5.930 | 2.921  | 0.062              |
|              | Trehalose 20 | 19.886          | 5.930 | 3.354  | 0.022              |
| Trehalose 15 | Sucrose 20   | -7.042          | 5.930 | -1.188 | 0.840              |
|              | Trehalose 20 | -4.479          | 5.930 | -0.755 | 0.973              |
| Sucrose 20   | Trehalose 20 | 2.564           | 5.930 | 0.432  | 0.998              |

*Note.* P-value adjusted for comparing a family of 6

*Note.* Results are averaged over the levels of: Annealing, Bacterial concentration

### Post Hoc Comparisons - Lyoprotectant \* Bacterial concentration

|               |               | Mean Difference | SE    | t      | P <sub>tukey</sub> |
|---------------|---------------|-----------------|-------|--------|--------------------|
| Sucrose E10   | Trehalose E10 | 6.402           | 4.842 | 1.322  | 0.555              |
|               | Sucrose E9    | -0.715          | 4.842 | -0.148 | 0.999              |
|               | Trehalose E9  | 23.095          | 4.842 | 4.770  | < .001             |
| Trehalose E10 | Sucrose E9    | -7.117          | 4.842 | -1.470 | 0.466              |
|               | Trehalose E9  | 16.692          | 4.842 | 3.448  | 0.008              |
| Sucrose E9    | Trehalose E9  | 23.810          | 4.842 | 4.918  | < .001             |

*Note.* P-value adjusted for comparing a family of 4

*Note.* Results are averaged over the levels of: Annealing, Lyoprotectant concentration

**Post Hoc Comparisons - Lyoprotectant \* Lyoprotectant concentration \* Bacterial concentration**

|                  |                  | <b>Mean Difference</b> | <b>SE</b> | <b>t</b> | <b>P<sub>tukey</sub></b> |
|------------------|------------------|------------------------|-----------|----------|--------------------------|
| Sucrose 10 E10   | Trehalose 10 E10 | -0.720                 | 7.282     | -0.099   | 1.000                    |
|                  | Sucrose 15 E10   | -22.713                | 7.282     | -3.119   | 0.127                    |
|                  | Trehalose 15 E10 | -12.293                | 7.282     | -1.688   | 0.859                    |
|                  | Sucrose 20 E10   | -25.883                | 7.282     | -3.554   | 0.050                    |
|                  | Trehalose 20 E10 | -16.375                | 7.282     | -2.249   | 0.531                    |
|                  | Sucrose 10 E9    | -29.050                | 7.282     | -3.989   | 0.018 *                  |
|                  | Trehalose 10 E9  | 8.450                  | 7.282     | 1.160    | 0.988                    |
|                  | Sucrose 15 E9    | -29.753                | 7.282     | -4.086   | 0.014 *                  |
|                  | Trehalose 15 E9  | 8.557                  | 7.282     | 1.175    | 0.987                    |
|                  | Sucrose 20 E9    | 8.062                  | 7.282     | 1.107    | 0.992                    |
|                  | Trehalose 20 E9  | 3.682                  | 7.282     | 0.506    | 1.000                    |
| Trehalose 10 E10 | Sucrose 15 E10   | -21.992                | 7.282     | -3.020   | 0.155                    |
|                  | Trehalose 15 E10 | -11.573                | 7.282     | -1.589   | 0.899                    |
|                  | Sucrose 20 E10   | -25.162                | 7.282     | -3.455   | 0.063                    |
|                  | Trehalose 20 E10 | -15.655                | 7.282     | -2.150   | 0.595                    |
|                  | Sucrose 10 E9    | -28.330                | 7.282     | -3.890   | 0.023 *                  |
|                  | Trehalose 10 E9  | 9.170                  | 7.282     | 1.259    | 0.978                    |
|                  | Sucrose 15 E9    | -29.033                | 7.282     | -3.987   | 0.018 *                  |
|                  | Trehalose 15 E9  | 9.278                  | 7.282     | 1.274    | 0.976                    |
|                  | Sucrose 20 E9    | 8.783                  | 7.282     | 1.206    | 0.984                    |
|                  | Trehalose 20 E9  | 4.403                  | 7.282     | 0.605    | 1.000                    |
| Sucrose 15 E10   | Trehalose 15 E10 | 10.420                 | 7.282     | 1.431    | 0.947                    |
|                  | Sucrose 20 E10   | -3.170                 | 7.282     | -0.435   | 1.000                    |
|                  | Trehalose 20 E10 | 6.338                  | 7.282     | 0.870    | 0.999                    |
|                  | Sucrose 10 E9    | -6.337                 | 7.282     | -0.870   | 0.999                    |
|                  | Trehalose 10 E9  | 31.162                 | 7.282     | 4.279    | 0.009 **                 |
|                  | Sucrose 15 E9    | -7.040                 | 7.282     | -0.967   | 0.997                    |
|                  | Trehalose 15 E9  | 31.270                 | 7.282     | 4.294    | 0.008 **                 |
|                  | Sucrose 20 E9    | 30.775                 | 7.282     | 4.226    | 0.010 *                  |
|                  | Trehalose 20 E9  | 26.395                 | 7.282     | 3.625    | 0.043 *                  |
| Trehalose 15 E10 | Sucrose 20 E10   | -13.590                | 7.282     | -1.866   | 0.769                    |
|                  | Trehalose 20 E10 | -4.082                 | 7.282     | -0.561   | 1.000                    |
|                  | Sucrose 10 E9    | -16.757                | 7.282     | -2.301   | 0.498                    |
|                  | Trehalose 10 E9  | 20.742                 | 7.282     | 2.848    | 0.214                    |
|                  | Sucrose 15 E9    | -17.460                | 7.282     | -2.398   | 0.439                    |
|                  | Trehalose 15 E9  | 20.850                 | 7.282     | 2.863    | 0.208                    |
|                  | Sucrose 20 E9    | 20.355                 | 7.282     | 2.795    | 0.235                    |
|                  | Trehalose 20 E9  | 15.975                 | 7.282     | 2.194    | 0.567                    |
| Sucrose 20 E10   | Trehalose 20 E10 | 9.507                  | 7.282     | 1.306    | 0.971                    |
|                  | Sucrose 10 E9    | -3.167                 | 7.282     | -0.435   | 1.000                    |
|                  | Trehalose 10 E9  | 34.332                 | 7.282     | 4.715    | 0.003 **                 |

**Post Hoc Comparisons - Lyoprotectant \* Lyoprotectant concentration \* Bacterial concentration**

|                  |                 | <b>Mean<br/>Difference</b> | <b>SE</b> | <b>t</b> | <b>p<sub>tukey</sub></b> |
|------------------|-----------------|----------------------------|-----------|----------|--------------------------|
|                  | Sucrose 15 E9   | -3.870                     | 7.282     | -0.531   | 1.000                    |
|                  | Trehalose 15 E9 | 34.440                     | 7.282     | 4.729    | 0.003 **                 |
|                  | Sucrose 20 E9   | 33.945                     | 7.282     | 4.662    | 0.003 **                 |
|                  | Trehalose 20 E9 | 29.565                     | 7.282     | 4.060    | 0.015 *                  |
| Trehalose 20 E10 | Sucrose 10 E9   | -12.675                    | 7.282     | -1.741   | 0.835                    |
|                  | Trehalose 10 E9 | 24.825                     | 7.282     | 3.409    | 0.069                    |
|                  | Sucrose 15 E9   | -13.378                    | 7.282     | -1.837   | 0.785                    |
|                  | Trehalose 15 E9 | 24.932                     | 7.282     | 3.424    | 0.067                    |
|                  | Sucrose 20 E9   | 24.438                     | 7.282     | 3.356    | 0.078                    |
|                  | Trehalose 20 E9 | 20.057                     | 7.282     | 2.754    | 0.252                    |
| Sucrose 10 E9    | Trehalose 10 E9 | 37.500                     | 7.282     | 5.150    | < .001 ***               |
|                  | Sucrose 15 E9   | -0.703                     | 7.282     | -0.096   | 1.000                    |
|                  | Trehalose 15 E9 | 37.607                     | 7.282     | 5.164    | < .001 ***               |
|                  | Sucrose 20 E9   | 37.112                     | 7.282     | 5.096    | 0.001 **                 |
|                  | Trehalose 20 E9 | 32.732                     | 7.282     | 4.495    | 0.005 **                 |
|                  | Sucrose 15 E9   | -38.203                    | 7.282     | -5.246   | < .001 ***               |
| Trehalose 10 E9  | Trehalose 15 E9 | 0.108                      | 7.282     | 0.015    | 1.000                    |
|                  | Sucrose 20 E9   | -0.387                     | 7.282     | -0.053   | 1.000                    |
|                  | Trehalose 20 E9 | -4.767                     | 7.282     | -0.655   | 1.000                    |
|                  | Sucrose 15 E9   | 38.310                     | 7.282     | 5.261    | < .001 ***               |
|                  | Sucrose 20 E9   | 37.815                     | 7.282     | 5.193    | < .001 ***               |
|                  | Trehalose 20 E9 | 33.435                     | 7.282     | 4.591    | 0.004 **                 |
| Trehalose 15 E9  | Sucrose 20 E9   | -0.495                     | 7.282     | -0.068   | 1.000                    |
|                  | Trehalose 20 E9 | -4.875                     | 7.282     | -0.669   | 1.000                    |
| Sucrose 20 E9    | Trehalose 20 E9 | -4.380                     | 7.282     | -0.601   | 1.000                    |

\* p < .05, \*\* p < .01, \*\*\* p < .001

*Note.* P-value adjusted for comparing a family of 12

*Note.* Results are averaged over the levels of: Annealing

**Table S12.** Post-hoc test to evaluate the effect of accelerated storage stability (week 2) on metabolic activity. \*p<0.05, \*\*p<0.01, and \*\*\*p<0.001

## Post Hoc Tests-Accelerated storage metabolic activity week 2

### Standard

#### Post Hoc Comparisons - Lyoprotectant

|         |           | Mean Difference | SE    | t     | ptukey |
|---------|-----------|-----------------|-------|-------|--------|
| Sucrose | Trehalose | 0.099           | 0.041 | 2.444 | 0.033  |

*Note.* Results are averaged over the levels of: Annealing, Lyoprotectant concentration, Bacterial concentration

#### Post Hoc Comparisons - Annealing

|    |     | Mean Difference | SE    | t      | ptukey |
|----|-----|-----------------|-------|--------|--------|
| No | Yes | -0.043          | 0.041 | -1.047 | 0.317  |

*Note.* Results are averaged over the levels of: Lyoprotectant, Lyoprotectant concentration, Bacterial concentration

#### Post Hoc Comparisons - Lyoprotectant concentration

|    |    | Mean Difference | SE    | t      | ptukey |
|----|----|-----------------|-------|--------|--------|
| 10 | 15 | -0.114          | 0.050 | -2.289 | 0.100  |
|    | 20 | -0.071          | 0.050 | -1.434 | 0.358  |
| 15 | 20 | 0.043           | 0.050 | 0.855  | 0.678  |

*Note.* P-value adjusted for comparing a family of 3

*Note.* Results are averaged over the levels of: Lyoprotectant, Annealing, Bacterial concentration

#### Post Hoc Comparisons - Bacterial concentration

|     |    | Mean Difference | SE    | t     | ptukey |
|-----|----|-----------------|-------|-------|--------|
| E10 | E9 | 0.272           | 0.041 | 6.715 | < .001 |

*Note.* Results are averaged over the levels of: Lyoprotectant, Annealing, Lyoprotectant concentration

#### Post Hoc Comparisons - Lyoprotectant \* Annealing

|              |               | Mean Difference | SE    | t      | ptukey |
|--------------|---------------|-----------------|-------|--------|--------|
| Sucrose No   | Trehalose No  | 0.063           | 0.057 | 1.104  | 0.695  |
|              | Sucrose Yes   | -0.078          | 0.057 | -1.365 | 0.544  |
|              | Trehalose Yes | 0.057           | 0.057 | 0.987  | 0.759  |
| Trehalose No | Sucrose Yes   | -0.142          | 0.057 | -2.468 | 0.121  |

### Post Hoc Comparisons - Lyoprotectant \* Annealing

|             |               | Mean Difference | SE    | t      | p <sub>tukey</sub> |
|-------------|---------------|-----------------|-------|--------|--------------------|
|             | Trehalose Yes | -0.007          | 0.057 | -0.116 | 0.999              |
| Sucrose Yes | Trehalose Yes | 0.135           | 0.057 | 2.352  | 0.145              |

*Note.* P-value adjusted for comparing a family of 4

*Note.* Results are averaged over the levels of: Lyoprotectant concentration, Bacterial concentration

### Post Hoc Comparisons - Lyoprotectant \* Lyoprotectant concentration

|              |              | Mean Difference | SE    | t      | p <sub>tukey</sub> |
|--------------|--------------|-----------------|-------|--------|--------------------|
| Sucrose 10   | Trehalose 10 | 0.043           | 0.070 | 0.605  | 0.988              |
|              | Sucrose 15   | -0.190          | 0.070 | -2.703 | 0.151              |
|              | Trehalose 15 | 0.005           | 0.070 | 0.071  | 1.000              |
|              | Sucrose 20   | -0.080          | 0.070 | -1.138 | 0.856              |
|              | Trehalose 20 | -0.020          | 0.070 | -0.285 | 1.000              |
| Trehalose 10 | Sucrose 15   | -0.232          | 0.070 | -3.308 | 0.059              |
|              | Trehalose 15 | -0.037          | 0.070 | -0.534 | 0.993              |
|              | Sucrose 20   | -0.122          | 0.070 | -1.743 | 0.534              |
|              | Trehalose 20 | -0.062          | 0.070 | -0.889 | 0.941              |
| Sucrose 15   | Trehalose 15 | 0.195           | 0.070 | 2.774  | 0.136              |
|              | Sucrose 20   | 0.110           | 0.070 | 1.565  | 0.635              |
|              | Trehalose 20 | 0.170           | 0.070 | 2.419  | 0.230              |
| Trehalose 15 | Sucrose 20   | -0.085          | 0.070 | -1.209 | 0.824              |
|              | Trehalose 20 | -0.025          | 0.070 | -0.356 | 0.999              |
| Sucrose 20   | Trehalose 20 | 0.060           | 0.070 | 0.854  | 0.950              |

*Note.* P-value adjusted for comparing a family of 6

*Note.* Results are averaged over the levels of: Annealing, Bacterial concentration

### Post Hoc Comparisons - Lyoprotectant \* Bacterial concentration

|               |               | Mean Difference | SE    | t     | p <sub>tukey</sub> |
|---------------|---------------|-----------------|-------|-------|--------------------|
| Sucrose E10   | Trehalose E10 | 0.182           | 0.057 | 3.165 | 0.039              |
|               | Sucrose E9    | 0.355           | 0.057 | 6.186 | < .001             |
|               | Trehalose E9  | 0.372           | 0.057 | 6.476 | < .001             |
| Trehalose E10 | Sucrose E9    | 0.173           | 0.057 | 3.020 | 0.049              |
|               | Trehalose E9  | 0.190           | 0.057 | 3.311 | 0.030              |
| Sucrose E9    | Trehalose E9  | 0.017           | 0.057 | 0.290 | 0.991              |

*Note.* P-value adjusted for comparing a family of 4

*Note.* Results are averaged over the levels of: Annealing, Lyoprotectant concentration

**Post Hoc Comparisons - Lyoprotectant \* Lyoprotectant concentration \* Bacterial concentration**

|                  |                  | <b>Mean<br/>Difference</b> | <b>SE</b> | <b>t</b> | <b>p<sub>tukey</sub></b> |
|------------------|------------------|----------------------------|-----------|----------|--------------------------|
| Sucrose 10 E10   | Trehalose 10 E10 | -0.055                     | 0.043     | -1.280   | 0.944                    |
|                  | Sucrose 15 E10   | -0.490                     | 0.043     | -11.405  | 0.004 **                 |
|                  | Trehalose 15 E10 | -0.115                     | 0.043     | -2.677   | 0.435                    |
|                  | Sucrose 20 E10   | -0.440                     | 0.043     | -10.241  | 0.006 **                 |
|                  | Trehalose 20 E10 | -0.215                     | 0.043     | -5.004   | 0.082                    |
|                  | Sucrose 10 E9    | -0.085                     | 0.043     | -1.978   | 0.700                    |
|                  | Trehalose 10 E9  | 0.055                      | 0.043     | 1.280    | 0.944                    |
|                  | Sucrose 15 E9    | 0.025                      | 0.043     | 0.582    | 1.000                    |
|                  | Trehalose 15 E9  | 0.040                      | 0.043     | 0.931    | 0.992                    |
|                  | Sucrose 20 E9    | 0.195                      | 0.043     | 4.539    | 0.111                    |
|                  | Trehalose 20 E9  | 0.090                      | 0.043     | 2.095    | 0.652                    |
| Trehalose 10 E10 | Sucrose 15 E10   | -0.435                     | 0.043     | -10.125  | 0.007 **                 |
|                  | Trehalose 15 E10 | -0.060                     | 0.043     | -1.397   | 0.915                    |
|                  | Sucrose 20 E10   | -0.385                     | 0.043     | -8.961   | 0.010 *                  |
|                  | Trehalose 20 E10 | -0.160                     | 0.043     | -3.724   | 0.199                    |
|                  | Sucrose 10 E9    | -0.030                     | 0.043     | -0.698   | 0.999                    |
|                  | Trehalose 10 E9  | 0.110                      | 0.043     | 2.560    | 0.474                    |
|                  | Sucrose 15 E9    | 0.080                      | 0.043     | 1.862    | 0.748                    |
|                  | Trehalose 15 E9  | 0.095                      | 0.043     | 2.211    | 0.604                    |
|                  | Sucrose 20 E9    | 0.250                      | 0.043     | 5.819    | 0.050 *                  |
|                  | Trehalose 20 E9  | 0.145                      | 0.043     | 3.375    | 0.257                    |
| Sucrose 15 E10   | Trehalose 15 E10 | 0.375                      | 0.043     | 8.728    | 0.012 *                  |
|                  | Sucrose 20 E10   | 0.050                      | 0.043     | 1.164    | 0.966                    |
|                  | Trehalose 20 E10 | 0.275                      | 0.043     | 6.401    | 0.036 *                  |
|                  | Sucrose 10 E9    | 0.405                      | 0.043     | 9.427    | 0.009 **                 |
|                  | Trehalose 10 E9  | 0.545                      | 0.043     | 12.685   | 0.003 **                 |
|                  | Sucrose 15 E9    | 0.515                      | 0.043     | 11.987   | 0.003 **                 |
|                  | Trehalose 15 E9  | 0.530                      | 0.043     | 12.336   | 0.003 **                 |
|                  | Sucrose 20 E9    | 0.685                      | 0.043     | 15.944   | 0.001 **                 |
|                  | Trehalose 20 E9  | 0.580                      | 0.043     | 13.500   | 0.002 **                 |
| Trehalose 15 E10 | Sucrose 20 E10   | -0.325                     | 0.043     | -7.565   | 0.020 *                  |
|                  | Trehalose 20 E10 | -0.100                     | 0.043     | -2.328   | 0.559                    |
|                  | Sucrose 10 E9    | 0.030                      | 0.043     | 0.698    | 0.999                    |
|                  | Trehalose 10 E9  | 0.170                      | 0.043     | 3.957    | 0.168                    |
|                  | Sucrose 15 E9    | 0.140                      | 0.043     | 3.259    | 0.281                    |
|                  | Trehalose 15 E9  | 0.155                      | 0.043     | 3.608    | 0.216                    |
|                  | Sucrose 20 E9    | 0.310                      | 0.043     | 7.215    | 0.023 *                  |
|                  | Trehalose 20 E9  | 0.205                      | 0.043     | 4.772    | 0.095                    |
| Sucrose 20 E10   | Trehalose 20 E10 | 0.225                      | 0.043     | 5.237    | 0.071                    |
|                  | Sucrose 10 E9    | 0.355                      | 0.043     | 8.263    | 0.014 *                  |
|                  | Trehalose 10 E9  | 0.495                      | 0.043     | 11.521   | 0.004 **                 |

**Post Hoc Comparisons - Lyoprotectant \* Lyoprotectant concentration \* Bacterial concentration**

|                  |                 | <b>Mean<br/>Difference</b> | <b>SE</b> | <b>t</b> | <b>p<sub>Tukey</sub></b> |
|------------------|-----------------|----------------------------|-----------|----------|--------------------------|
|                  | Sucrose 15 E9   | 0.465                      | 0.043     | 10.823   | 0.005 **                 |
|                  | Trehalose 15 E9 | 0.480                      | 0.043     | 11.172   | 0.005 **                 |
|                  | Sucrose 20 E9   | 0.635                      | 0.043     | 14.780   | 0.002 **                 |
|                  | Trehalose 20 E9 | 0.530                      | 0.043     | 12.336   | 0.003 **                 |
| Trehalose 20 E10 | Sucrose 10 E9   | 0.130                      | 0.043     | 3.026    | 0.335                    |
|                  | Trehalose 10 E9 | 0.270                      | 0.043     | 6.284    | 0.038 *                  |
|                  | Sucrose 15 E9   | 0.240                      | 0.043     | 5.586    | 0.057                    |
|                  | Trehalose 15 E9 | 0.255                      | 0.043     | 5.935    | 0.046 *                  |
|                  | Sucrose 20 E9   | 0.410                      | 0.043     | 9.543    | 0.008 **                 |
|                  | Trehalose 20 E9 | 0.305                      | 0.043     | 7.099    | 0.025 *                  |
| Sucrose 10 E9    | Trehalose 10 E9 | 0.140                      | 0.043     | 3.259    | 0.281                    |
|                  | Sucrose 15 E9   | 0.110                      | 0.043     | 2.560    | 0.474                    |
|                  | Trehalose 15 E9 | 0.125                      | 0.043     | 2.909    | 0.366                    |
|                  | Sucrose 20 E9   | 0.280                      | 0.043     | 6.517    | 0.033 *                  |
|                  | Trehalose 20 E9 | 0.175                      | 0.043     | 4.073    | 0.154                    |
| Trehalose 10 E9  | Sucrose 15 E9   | -0.030                     | 0.043     | -0.698   | 0.999                    |
|                  | Trehalose 15 E9 | -0.015                     | 0.043     | -0.349   | 1.000                    |
|                  | Sucrose 20 E9   | 0.140                      | 0.043     | 3.259    | 0.281                    |
|                  | Trehalose 20 E9 | 0.035                      | 0.043     | 0.815    | 0.997                    |
| Sucrose 15 E9    | Trehalose 15 E9 | 0.015                      | 0.043     | 0.349    | 1.000                    |
|                  | Sucrose 20 E9   | 0.170                      | 0.043     | 3.957    | 0.168                    |
|                  | Trehalose 20 E9 | 0.065                      | 0.043     | 1.513    | 0.880                    |
| Trehalose 15 E9  | Sucrose 20 E9   | 0.155                      | 0.043     | 3.608    | 0.216                    |
|                  | Trehalose 20 E9 | 0.050                      | 0.043     | 1.164    | 0.966                    |
| Sucrose 20 E9    | Trehalose 20 E9 | -0.105                     | 0.043     | -2.444   | 0.515                    |

\* p < .05, \*\* p < .01

*Note.* P-value adjusted for comparing a family of 12

*Note.* Results are averaged over the levels of: Annealing
